# Supplementary material for: Structural polymorphisms within a common powdery mildew effector scaffold as a driver of coevolution with cereal immune receptors
Source: PubMed Central journal article supplement — Proc Natl Acad Sci U S A. 2023 Jul 31;120(32):e2307604120. doi: 10.1073/pnas.2307604120 (PMC10410722; doi:10.1073/pnas.2307604120), 2023-07-31
Supplement: pnas.2307604120.sapp.pdf [file pnas.2307604120.sapp.pdf]

## Supporting Information for

### Structural polymorphisms within a common powdery mildew effector scaffold as a driver of co-evolution with cereal immune receptors

Yu Cao<sup>a, b, 1</sup>, Florian Kümmel<sup>a, 1</sup>, Elke Logemann<sup>a</sup>, Jan M. Gebauer<sup>b</sup>, Aaron W. Lawson<sup>a</sup>, Dongli Yu<sup>a, b</sup>, Matthias Uthoff<sup>b</sup>, Beat Keller<sup>c</sup>, Jan Jirschitzka<sup>a, b</sup>, Ulrich Baumann<sup>b</sup>, Kenichi Tsuda<sup>a, d</sup>, Jijie Chai<sup>a, b, e, f, 2</sup>, Paul Schulze-Lefert<sup>a, g, 2</sup>

<sup>a</sup>Department of Plant Microbe Interactions, Max Planck Institute for Plant Breeding Research, 50829 Cologne, Germany

<sup>b</sup>Department of chemistry, Institute of Biochemistry, University of Cologne, 50674 Cologne, Germany

<sup>c</sup>Department of Plant and Microbial Biology, University of Zurich, 8008 Zurich, Switzerland

<sup>d</sup>State Key Laboratory of Agricultural Microbiology, Hubei Hongshan Laboratory, Hubei Key Lab of Plant Pathology, College of Plant Science and Technology, Huazhong Agricultural University, 430070, Wuhan, China

<sup>e</sup>Westlake Laboratory of Life sciences and Biomedicine, School of Life Sciences, Westlake University, 18 Shilongshan Road, Hangzhou 310024, China

<sup>f</sup>Beijing Frontier Research Center for Biological Structure, Center for Plant Biology, School of Life Sciences, Tsinghua University, 100084 Beijing, China

<sup>g</sup>Cluster of Excellence on Plant Sciences, Max Planck Institute for Plant Breeding Research, 50829 Cologne, Germany

<sup>1</sup>These authors contributed equally to this work.

<sup>2</sup>Correspondence to: Jijie Chai - [chai@mpipz.mpg.de](mailto:chai@mpipz.mpg.de) and Paul Schulze-Lefert - [schlelf@mpipz.mpg.de](mailto:schlelf@mpipz.mpg.de).

#### This PDF file includes:

*SI Materials and Methods*  
Figures S1 to S10  
Tables S1 to S2  
Supporting References

#### Other supporting materials for this manuscript include the following:

Datasets S1–S2

## ***SI Materials and Methods***

### **Transient gene expression in *N. benthamiana* and protein detection by immunoblotting**

For *N. benthamiana* transient gene expression, *AVR<sub>A6</sub>*, *CSEP0333*, and effector chimeras and mutants were cloned into the *pDONR221* vector (Invitrogen). The obtained plasmids were recombined by an LR clonase II (Thermo Fisher Scientific) into the *pXCSG-mYFP* vector with a C-terminally fused mYFP epitope tag. Constructs were verified by Sanger sequencing. The *Mla6* and *Mla7* expression clones were previously described in refs. 1 and 2. Expression constructs were transformed into *Agrobacterium tumefaciens* GV3101 (pMP90RK) by electroporation. Transformants were grown on LB media selection plates containing rifampicin (15 mg ml<sup>-1</sup>), gentamycin (25 mg ml<sup>-1</sup>), kanamycin (50 mg ml<sup>-1</sup>), and spectinomycin (50 mg ml<sup>-1</sup>) for transformants harboring *pGWB517-Mla6-4×Myc* or carbenicillin (50 mg ml<sup>-1</sup>) (3) for *pXCSG-mYFP* effector constructs (4).

Individual *Agrobacterium* transformants were cultured in LB medium containing respective antibiotics at 28 °C for 16 h. Bacterial cells were harvested by 2500 *g* for 15 min and resuspended with infiltration buffer containing 10 mM MES pH 5.6, 10 mM MgCl<sub>2</sub>, and 150 μM acetosyringone. Construct expression was conducted in leaves of four-week-old *N. benthamiana* plants via *Agrobacterium*-mediated transient expression assays in the presence of the P19 and CMV2b suppressors of RNAi silencing (5). The final OD<sub>600</sub> of receptor, effector, and RNAi silencing suppressor strains was adjusted to 0.5 each. Phenotypic data were recorded at day 6 after infiltration. For protein detection, the leaf material from four individual plants was harvested 48 h after infiltration, flash-frozen in liquid nitrogen and ground to powder using a Retsch bead beater. Plant powder was mixed with 4 x Laemmli buffer in a 1:2 ratio. After centrifugation at 16,000 *g* for 15 min, 5 μl of supernatant were loaded onto a 10% SDS-PAGE. Separated proteins were transferred to a PVDF membrane and probed with monoclonal mouse anti-Myc (1:3,000; R950-25, ThermoFisher), polyclonal rabbit anti-GFP (1:3,000; pabg1, Chromotek) followed by polyclonal goat anti-mouse IgG-HRP (1:7,500; ab6728, Abcam) or polyclonal swine anti-rabbit IgG-HRP (1:5,000; PO399, Agilent DAKO) antibodies. Protein was detected using SuperSignal West Femto: SuperSignal substrates (ThermoFisher Scientific) in a 1:1 ratio.

### **Microscale Thermophoresis (MST)**

For microscale thermophoresis experiments, total RNA was isolated from 7-day-old barley cv. Golden promise plants by phenol/chloroform extraction. Briefly, 5 g of leaf material were ground to a fine powder in liquid nitrogen. In a 50-mL propylene tube, the powder was resuspended in 10 mL lysis buffer (100 mM TRIS pH 8.0, 100 mM NaCl, 20 mM EGTA, 2% SDS) and 100 μL 2-mercaptoethanol, followed by the addition of 1 volume of phenol. Tubes were incubated for 20 min

while mixing in a revolving rotator, followed by the addition of 0.5 volume mL chloroform and another 15 min of mixing. Samples were centrifuged for 10 min at maximum speed, and the upper aqueous phase was transferred to a fresh tube. Phenol/chloroform extraction was repeated a total of three times, followed by a fourth time with chloroform only. Then, nucleic acids were precipitated by the addition of 0.1 volumes of DEPC-treated 3 M sodium acetate pH 5.2 and 2.5 volumes of ethanol, following by incubation at -70 °C for >30 min. After centrifugation at 30 min at max. speed, pellets were resuspended in 5 mL of DEPC-treated water, followed by addition of 5 mL DEPC-treated LiCl and incubation on ice at 4 °C for >3 hrs. Finally, after centrifugation at 30 min at max. speed, pellets were resuspended in 1.8 mL DEPC-treated water and precipitated one more time using sodium acetate and ethanol, followed by three washing steps with 70% ethanol. RNA pellets were resuspended in 500 µL DEPC-treated water. To obtain RNA concentrations >5 µg µL<sup>-1</sup>, the RNA pellets from 24 extractions were pooled.

The fluorescent dye NT-647 (MO-L001, NanoTemper Technologies) was used to label effector proteins GST or BSA. The labeled proteins were eluted with the reaction buffer (20 mM phosphate-buffered saline, 150 mM NaCl, and 0.05% (v/v) Tween 20, pH 7.4), and mixed with different concentrations of barley total RNA (phenol/chloroform) before loading onto Monolith NT.115 (NanoTemper Technologies). Data were treated by the KD Fit function of the Nano Temper Analysis Software (version 1.5.3).

## Supplementary figures

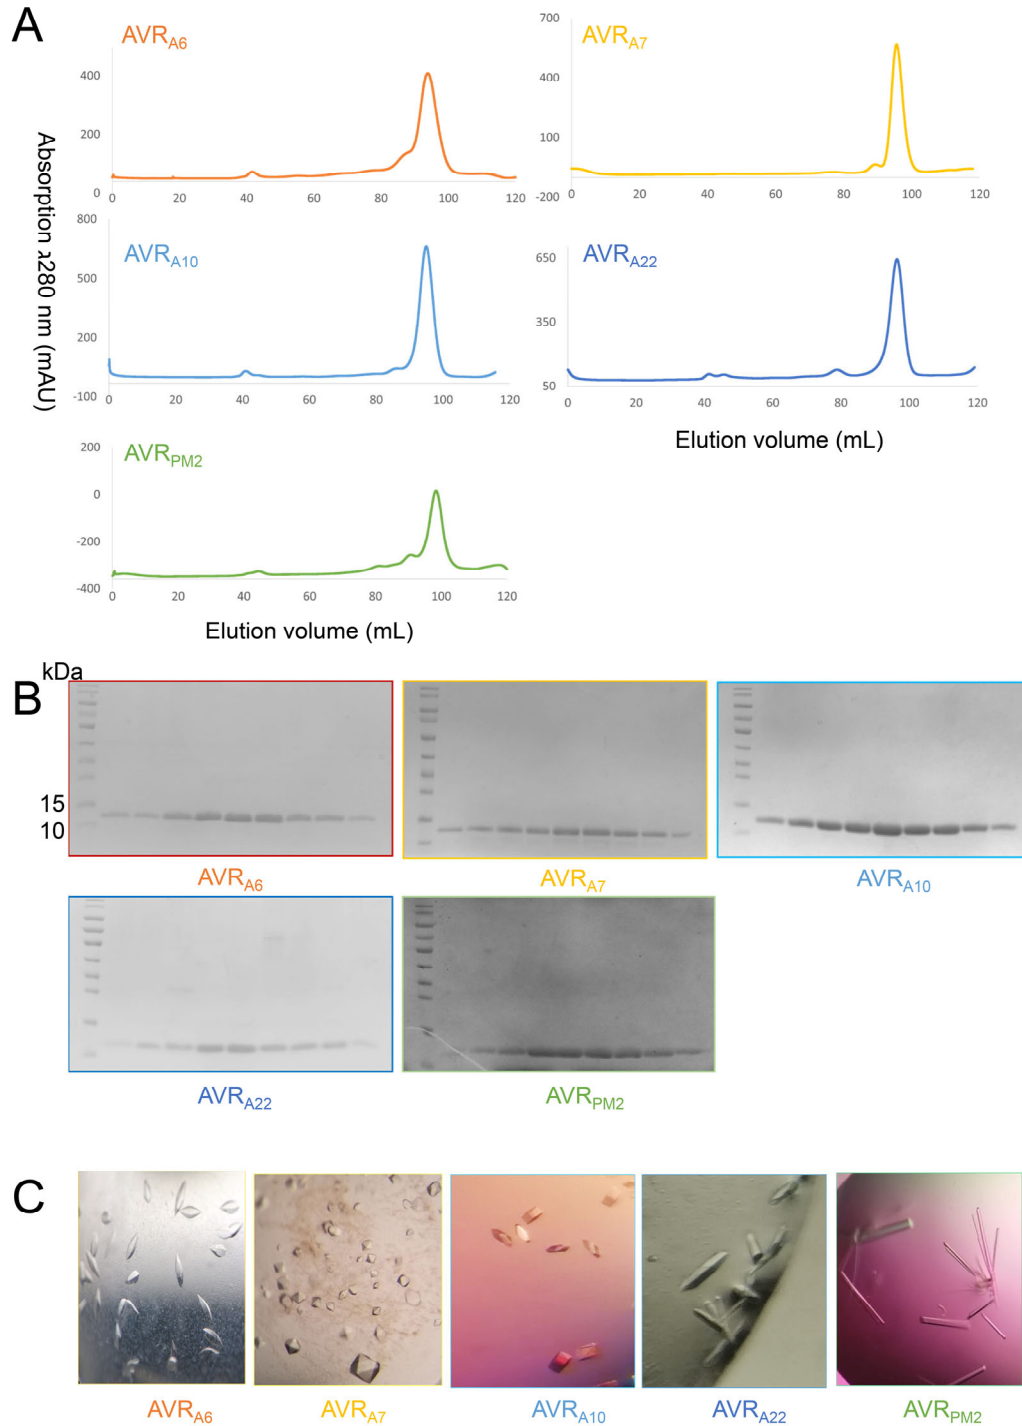

**Figure S1. Purification and crystallization of *Blumeria graminis* AVR effector proteins.** (A) Absorption spectra at 280 nm (mAU) for the effectors that were purified using size-exclusion

chromatography (SEC). The AVR<sub>A6</sub>, AVR<sub>A10</sub>, AVR<sub>A22</sub>, and AVR<sub>PM2</sub> proteins were obtained from *E. coli* SHuffle cells (NEB). Although AVR<sub>A7</sub> could be purified from *E. coli*, the successfully crystallized protein was purified from insect cells. (B) Coomassie staining of selected peak fractions. (C) Representative pictures of crystals obtained for five AVR effectors.

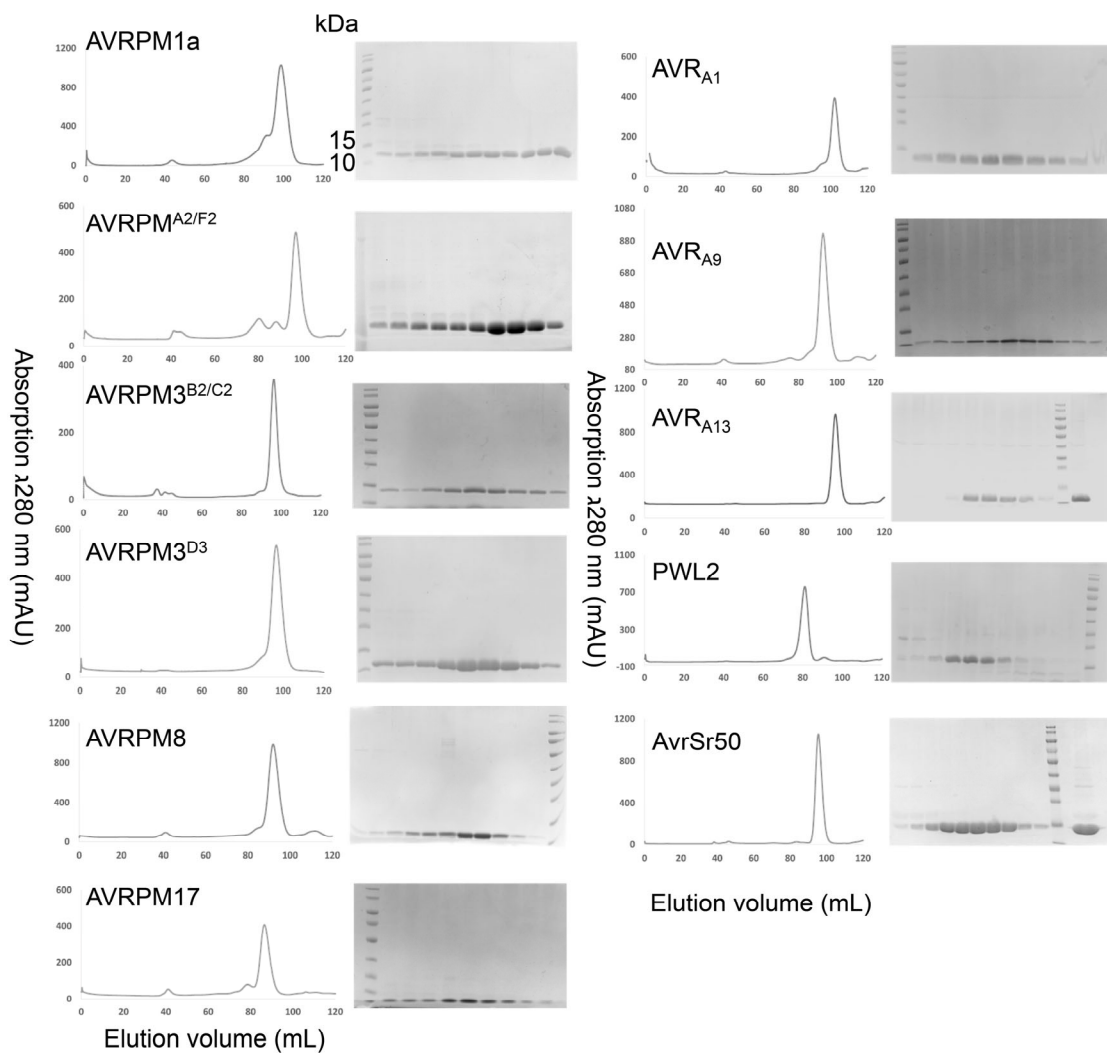

**Figure S2. Purification of additional ascomycete effectors.** The AVR effectors proteins were obtained from *E. coli* SHuffle cells (NEB), except for AVR<sub>A13</sub> and AvrSr50, which were expressed in insect cells. These 11 additional effectors were purified to homogeneity using SEC but failed to subsequently yield well-diffracting crystals.

A

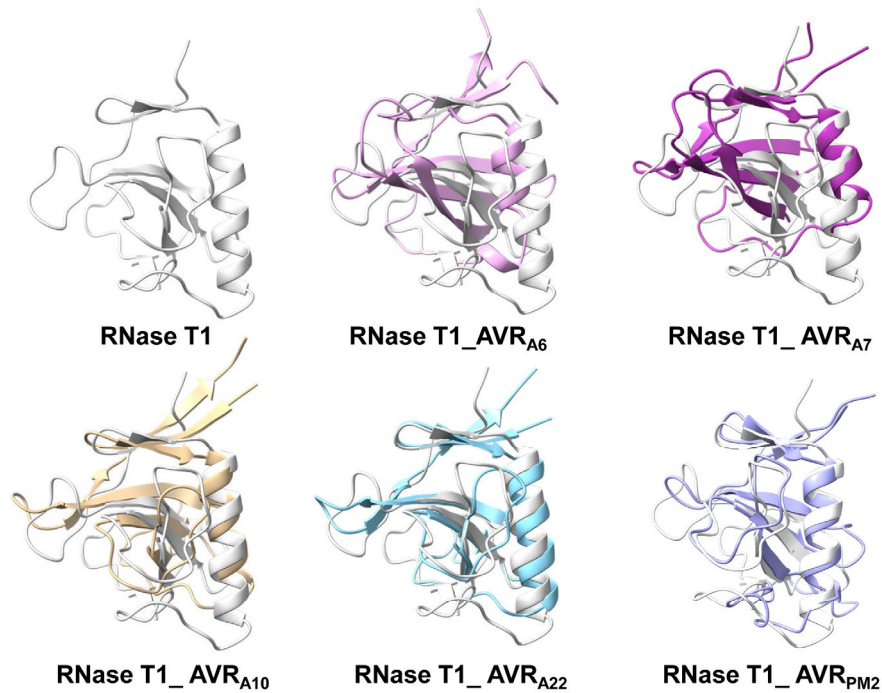

B

| Chain              | Z    | RMSD | LALI | # residues | % identity |
|--------------------|------|------|------|------------|------------|
| AVR <sub>PM2</sub> | 10.7 | 2.5  | 87   | 99         | 16         |
| AVR <sub>A10</sub> | 10.4 | 2.4  | 85   | 94         | 13         |
| AVR <sub>A22</sub> | 10.3 | 2.4  | 86   | 94         | 13         |
| AVR <sub>A6</sub>  | 5.8  | 3.5  | 77   | 92         | 6          |
| AVR <sub>A7</sub>  | 3.7  | 3.2  | 63   | 92         | 10         |

C

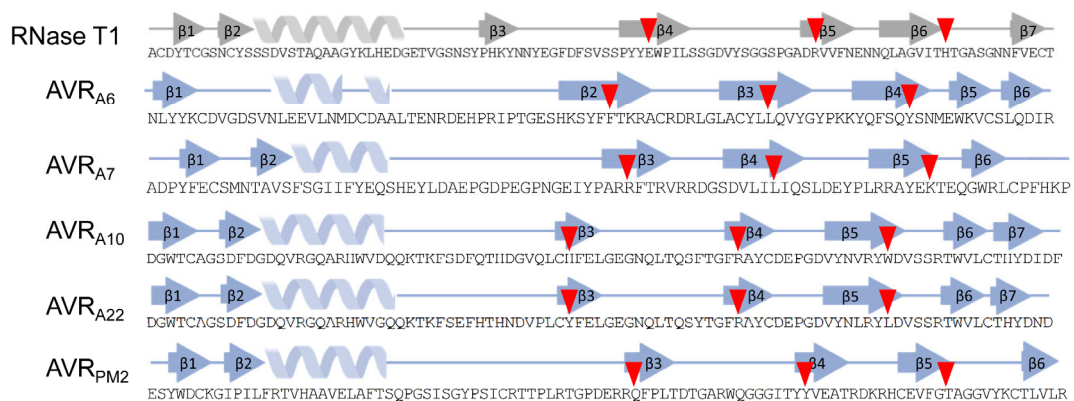

**Figure S3. Structural comparison of *Blumeria graminis* AVR effectors with RNase T1 from *Aspergillus oryzae*.** (A) Superimposition of the AVR structures with RNase T1 (PDB: 9RNT) in

cartoon representation. (B) Pairwise structural comparisons using the DALI server. (C) 2D-representation of the RNase T1 structure and AVR effectors with residues corresponding to the catalytic triad in RNase T1 highlighted with a red triangle.



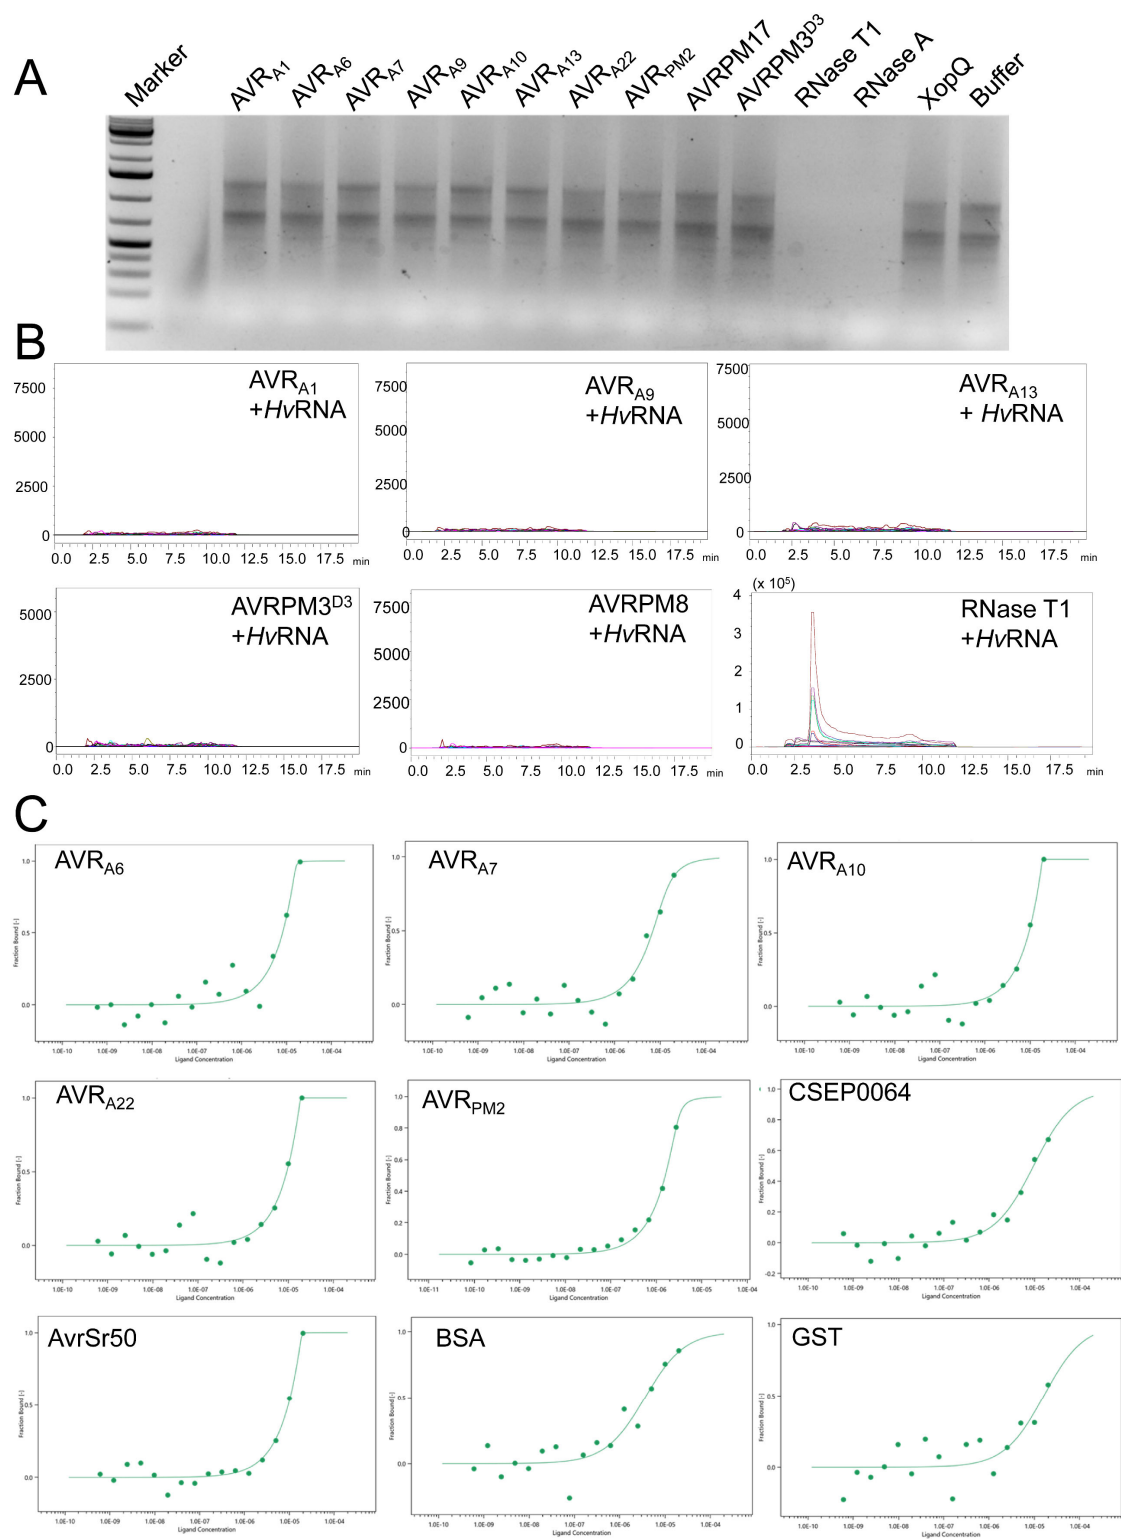

**Figure S4. *Blumeria graminis* AVR effectors are pseudo RNases.** (A) Co-incubation of RNA with AVR effectors for 16 hours and subsequent gel electrophoresis (1% agarose gel, 100 V, 45

min) Marker: GeneRuler 1kb Plus DNA ladder (Invitrogen). (B) Detection of 2' , 3' -cNMPs synthetase activity using LC-MS for additional AVR effector proteins. (C) MST traces of AVR effectors as well as non-RNase-like fold proteins BSA, GST and AvrSr50 with *Hv*RNA. All proteins were recombinantly expressed, purified, and subsequently labelled using the MO-L001 labelling kit (NanoTemper). The highest RNA concentration was set to 3750 ng  $\mu\text{l}^{-1}$ . Traces are representative of three experimental replicates with similar results.

**Figure S5**

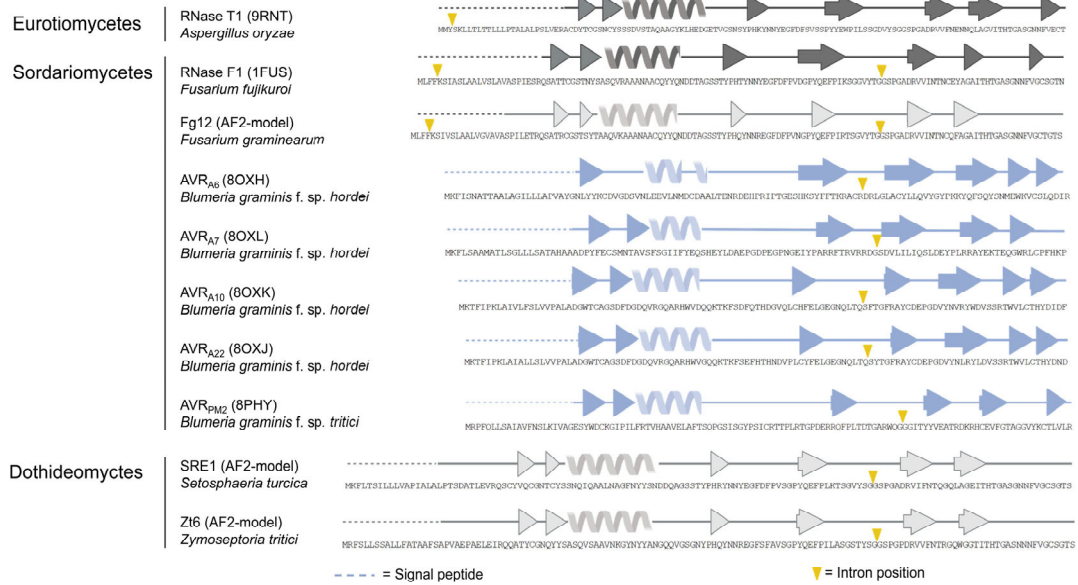

**Figure S5. *Blumeria graminis* AVR effectors share a single intron with RNase F1 family members.** 2D-representation of structures or AlphaFold2-models of characterized secreted ribonucleases and RALPH effectors with intron positions in the translated sequences highlighted with a yellow triangle. Signal peptide sequences are pictured with a dashed line. NCBI gene identifiers used: RNase T1: AP007171.1; RNase F1: AB355898.1; Fg12: FG11190.1; Zt6: NC\_018216.1; SRE1: NW\_007360025.1 (SETTUDRAFT\_163271); AVR<sub>A6</sub>: UNSH01000074 (BLGHR1\_15960); AVR<sub>A7</sub>: UNSH01000097 (BLGHR1\_17217) AVR<sub>A10</sub> and AVR<sub>A22</sub>: CAUH01000387.1 (BGHDHI4\_bgh03730) AVR<sub>PM2</sub>: KX765276.1.

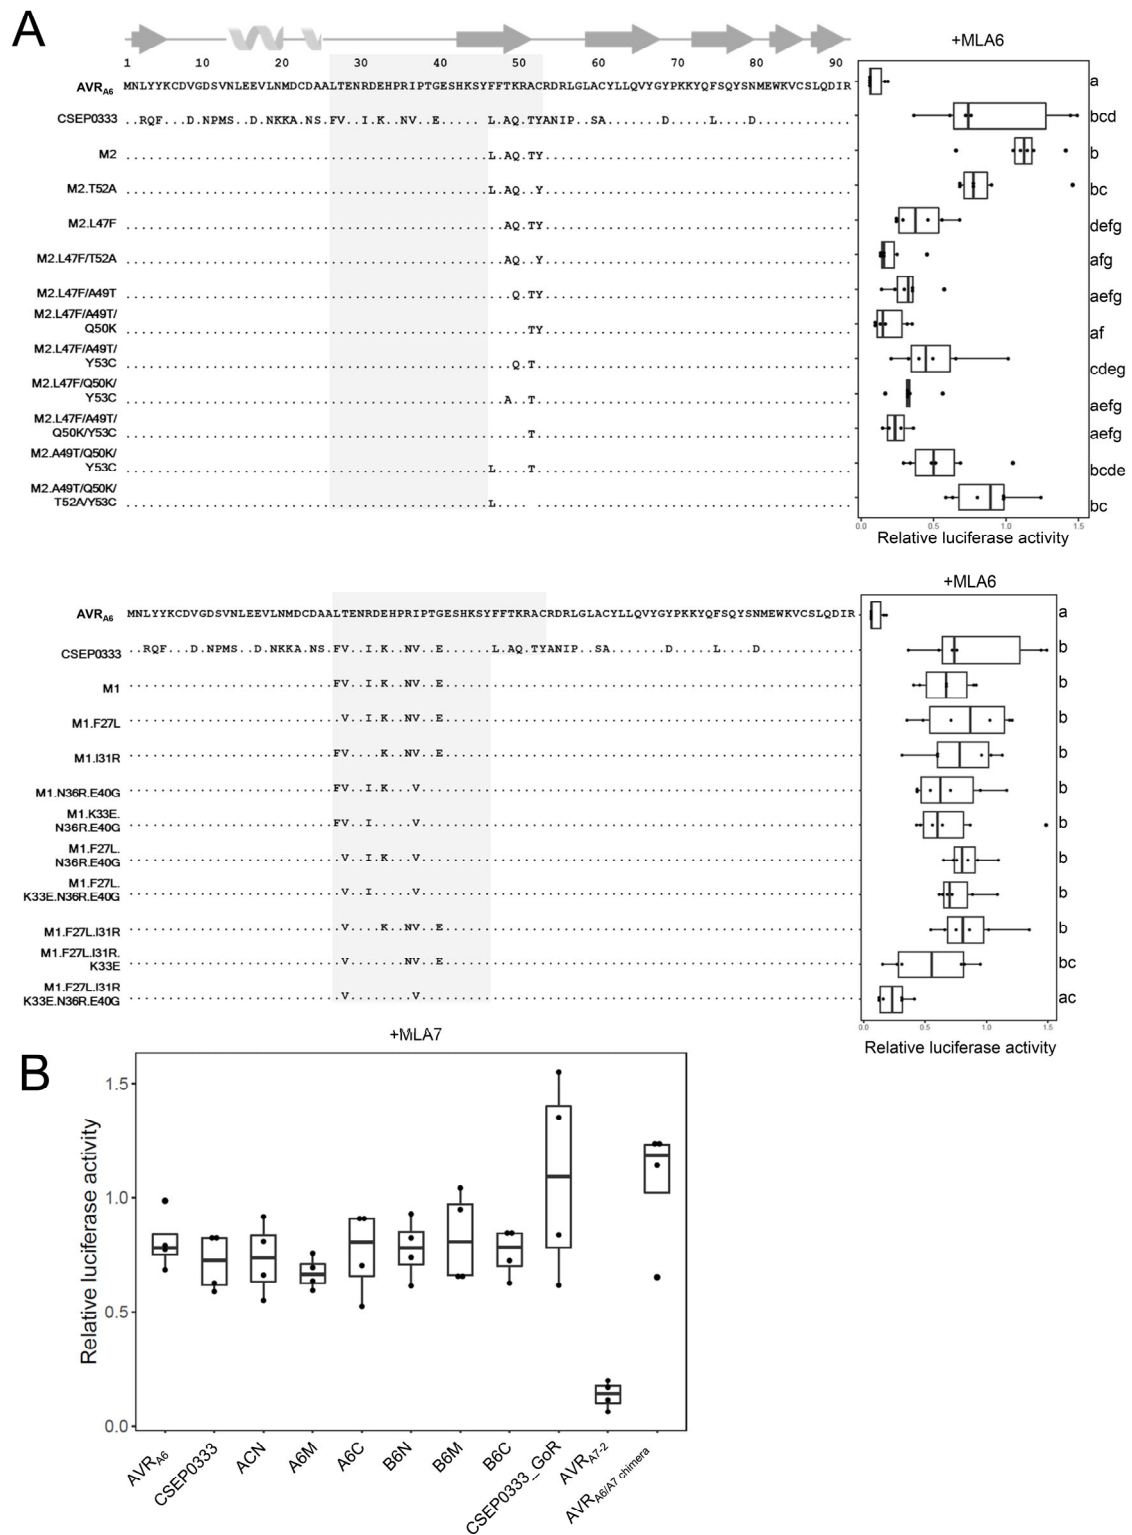

**by MLA6 in barley protoplasts.** (A) Hybrid effectors with targeted substitutions were co-transfected with MLA6 into barley protoplasts and cell death was quantified by measuring luciferase reporter activity. Letters indicate results of statistical variance analysis using the Kruskal–Wallis test followed by Dunn’s post hoc tests ( $P < 0.05$ ). Raw relative luciferase measurements and P-values for all protoplast plots are provided in Supplementary Dataset S1. (B) Selected effector constructs were co-transfected with MLA7 into barley protoplasts as a control for receptor specificity.

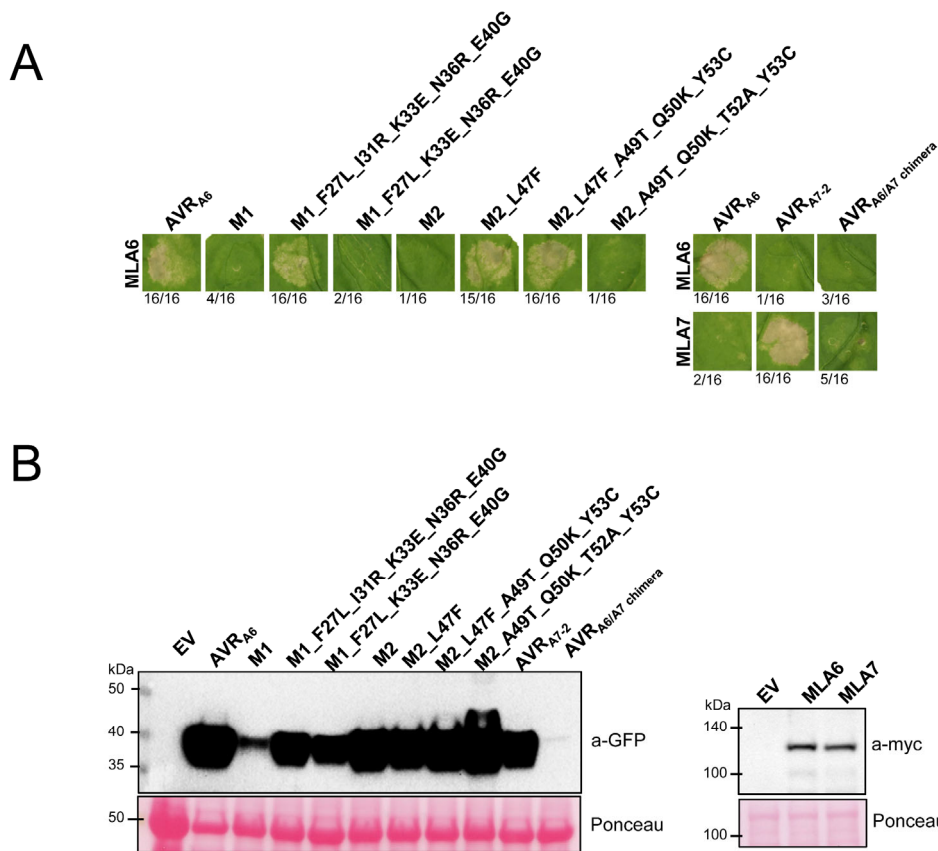

**Figure S7. Six amino acids in the central segment of AVR<sub>A6</sub> are essential for the detection by MLA6 in *N. benthamiana*.** (A) Selected effector hybrids with targeted amino acid substitutions were co-expressed in *N. benthamiana* using *Agrobacterium*-mediated infiltration. The cell death score is indicated below the representative pictures from 16 replicates. (B) Immunoblot to detect accumulation of effector and receptor proteins.

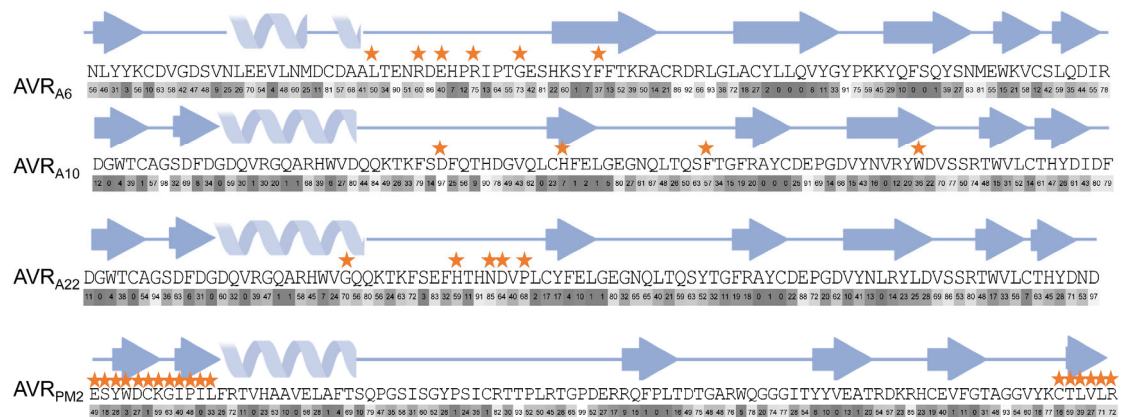

**Figure S8. Relative solvent accessibility of *Blumeria graminis* AVR effector sequences.** Relative solvent accessibility was computed using PyMOL. Orange asterisks indicate the residues important for recognition by the cognate NLR receptor. A darker color means less solvent accessibility, a lighter color means more accessibility, and the number indicates the percentage of solvent accessibility.

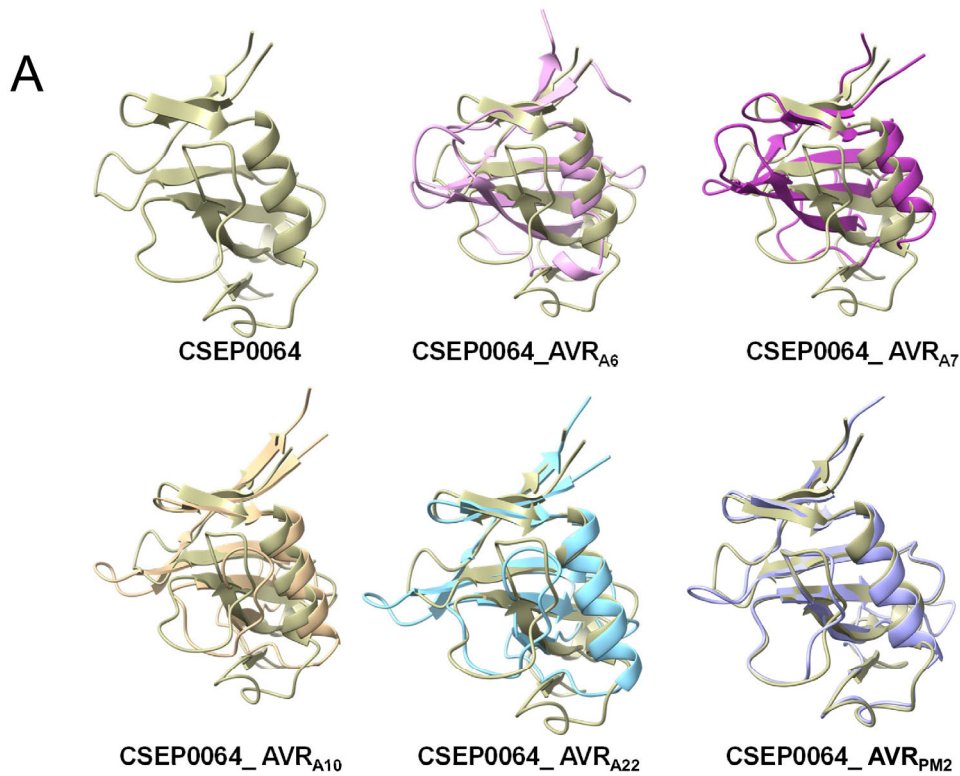

**B**

|                              | Q      | scoring<br>P | Z     | RMSD  | N_align | N_gaps | %seq | Query %sse | target structure<br>%sse | Nres |
|------------------------------|--------|--------------|-------|-------|---------|--------|------|------------|--------------------------|------|
| AVR <sub>A6</sub> _CSEP0064  | 0.267  | 2.971        | 4.939 | 2.249 | 61      | 9      | 11   | 56         | 83                       | 92   |
| AVR <sub>A7</sub> _CSEP0064  | 0.208  | 2.033        | 3.817 | 3.389 | 65      | 6      | 9    | 67         | 86                       | 92   |
| AVR <sub>A10</sub> _CSEP0064 | 0.442  | 5.912        | 6.961 | 2.142 | 78      | 7      | 18   | 67         | 75                       | 94   |
| AVR <sub>A22</sub> _CSEP0064 | 0.4397 | 5.707        | 6.836 | 2.158 | 78      | 7      | 15   | 67         | 75                       | 94   |
| AVR <sub>PM2</sub> _CSEP0064 | 0.7065 | 14.14        | 11.32 | 1.228 | 89      | 3      | 44   | 78         | 100                      | 99   |

**C**

```

1      10      20      30      40
AVRA7 MADPYFEC SMNTAVS...FSGIIFYEQSHEYL...DAEPGDPEGPN
AVRA6 .MNLYYKCDVGD SVN...LEEVLNMDCD...AALTENRDEHPRIPTGES
AVRA10 .MDGWTCAGSDFDGDQVRGQARHWVDQQKTKFSD...
AVRA22 .MDGWTCAGSDFDGDQVRGQARHWVDQQKTKFSE...
AVRPM2 .MESYWDCKGIPILFRITVHAAVELAFTSQPGSISGYPICRTTPLRTGPDERRQFPLTDT
CSEP0064 MAAAYWDCKDGT EIPERNVRAAVVLA FN YRKESFHGYPATFIIGSTFSGVGEVRQFPVEDS

50      60
AVRA7 GEIYP...ARRFTRVRRDGSVDVLI LIQSLDE...Y
AVRA6 .HKS YFFTKRAC...RDR LGLAC YLLQVYG...Y
AVRA10 .FQTHDGVQLCHFELGEGNQLTQSFTGFRAYCDEPGD
AVRA22 .FHTHNDVPLCYFELGEGNQLTQSYTGFRAYCDEPGD
AVRPM2 GARWQGGGITYYVEATRDKRHCEVFGTAGGVYKCTLVLRD...
CSEP0064 DANWQGGAVKYYILTNKRGSYLEVFSSVGS GNKCTFVEG...

70      80      90
AVRA7 PL.RRAYEKTEQGWRLCPFHKP...
AVRA6 PKKYQFSQYSNMEWKVCSLQDIR...
AVRA10 VYNVRYWDVSSRTWVLC THYDIDFESDYR
AVRA22 VYNLRYLDVSSRTWVLC THYDNDFESDYR
AVRPM2 ...
CSEP0064 ...

```

**Figure S9. Structural comparison of *Blumeria graminis* AVR effectors with CSEP0064.** (A) Superimposition of the AVR structures with CSEP0064 (BEC1054) (PDB: 6FMB) in cartoon



representation. (B) Pairwise structural comparisons using the DALI server. (C) Sequence alignment of AVR structures with CSEP0064.

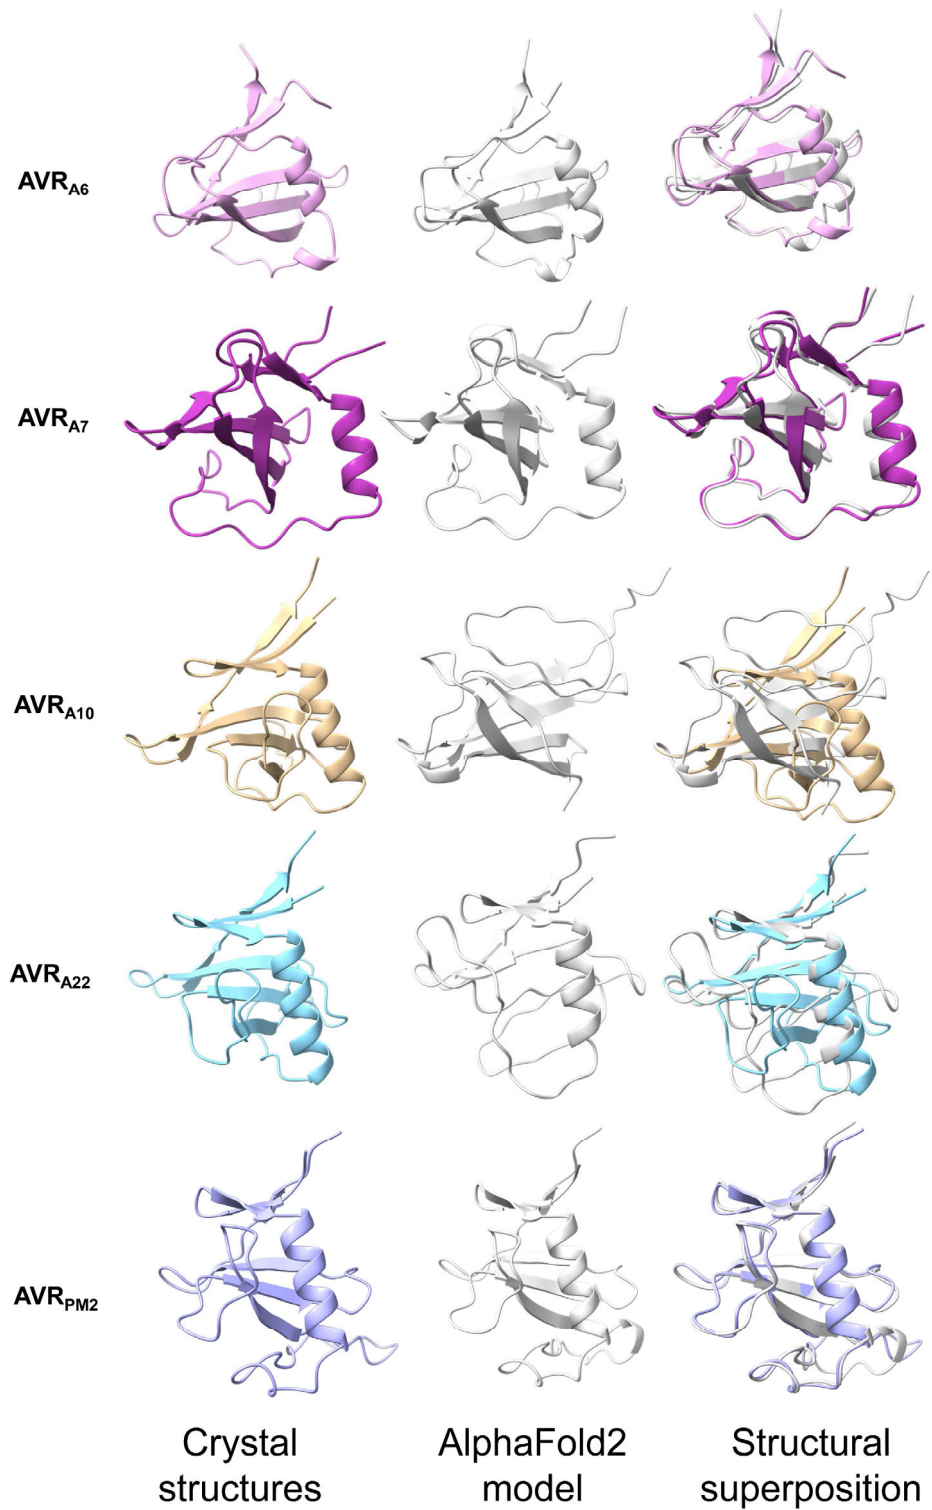

**Figure S10. Structural comparison of the AlphaFold2-predicted and experimentally determined structure of AVR effectors.** (A) For structural modelling, Colabfold v1.3

([colab.research.google.com/github/sokrypton/ColabFold/blob/main/AlphaFold2.ipynb](https://colab.research.google.com/github/sokrypton/ColabFold/blob/main/AlphaFold2.ipynb)) was used to predict the structures of the AVR effectors without their signal peptides. The top-ranking model was used for superimposition with the experimental structure.

**Table S1.** Crystallographic data collection and refinement.

| Crystallographic data collection and refinement |                        |                          |                        |
|-------------------------------------------------|------------------------|--------------------------|------------------------|
|                                                 | AVR <sub>A6</sub>      | AVR <sub>A7</sub>        | AVR <sub>A10</sub>     |
| <b>Data collection</b>                          |                        |                          |                        |
| Beamline                                        | P13 / EMBL@DESY        | ID30B / ESRF             | P14 / EMBL@DESY        |
| Wavelength (Å)                                  | 0.9762                 | 0.9763                   | 0.9763                 |
| Space group                                     | P 65 2 2 (No. 179)     | P 41 21 2 (No. 92)       | C 1 2 1 (No. 5)        |
| <b>Cell dimensions</b>                          |                        |                          |                        |
| a, b, c (Å)                                     | 62.47, 62.47, 202.37   | 57.55, 57.55, 121.64     | 125.94, 28.96, 29.18   |
| $\alpha, \beta, \gamma$ (°)                     | 90, 90, 120            | 90, 90, 90               | 90, 96.67, 90          |
| Resolution (Å) <sup>§</sup>                     | 42.20-2.50 (2.65-2.50) | 33.82 - 1.56 (1.65-1.55) | 31.27-1.38 (1.47-1.38) |
| R <sub>meas</sub> (%) §                         | 7.7 (380.2)            | 8.2 (245.3)              | 8.2 (250)              |
| CC 1/2 §                                        | 100(40.2)              | 99.8 (18.2)              | 99.9 (51.6)            |
| Mean I/sigI §                                   | 24.36 (0.63)           | 8.18 (0.46)              | 12.25 (0.68)           |
| Completeness (%)§                               | 99.9 (99.9)            | 97.7 (93.2)              | 79.3 (33.4)            |
| Multiplicity§                                   | 18.3 ( 19.0)           | 3.3 (3.1)                | 6.9 (6.4)              |
| <b>Refinement</b>                               |                        |                          |                        |
| No. reflections #                               | 8696 (816)             | 29943 (2878)             | 21484 (2109)           |
| R <sub>work</sub> /R <sub>free</sub> (%)        | 27.8 / 31.3            | 19.3 / 21.6              | 16.8 / 18.6            |
| No. of atoms                                    | 1477                   | 3290                     | 1536                   |
| a.a. residues                                   | 183                    | 184                      | 94                     |
| protein chains per asu                          | 2                      | 2                        | 1                      |
| Bond lengths (Å)                                | 0.003                  | 0.017                    | 0.0158                 |
| Bond angles (°)                                 | 0.674                  | 0.92                     | 1.34                   |
| <b>Ramachandran plot</b>                        |                        |                          |                        |
| Favored (%)                                     | 95.48                  | 99.44                    | 98.91                  |
| Allowed (%)                                     | 2.82                   | 0.56                     | 1.09                   |
| Outlier (%)                                     | 1.69                   | 0                        | 0                      |

  

|                                          | AVR <sub>A22</sub>       | AVR <sub>PM2 #1</sub>    | AVR <sub>PM2 #2</sub>      |
|------------------------------------------|--------------------------|--------------------------|----------------------------|
| <b>Data collection</b>                   |                          |                          |                            |
| Beamline                                 | X06SA /SLS               | X06SA /SLS               | X06SA /SLS                 |
| Wavelength (Å)                           | 0.9999                   | 0.9999                   | 0.9999                     |
| Space group                              | P 21 21 21 (No. 19)      | C 2 2 21 (No. 20)        | P 21 (No. 4)               |
| <b>Cell dimensions</b>                   |                          |                          |                            |
| a, b, c (Å)                              | 48.10, 60.76, 66.35      | 50.41, 53.86, 61.81      | 36.67, 61.85, 37.16        |
| $\alpha, \beta, \gamma$ (°)              | 90, 90, 90               | 90, 90, 90               | 90, 94.14, 90.00           |
| Resolution (Å) <sup>§</sup>              | 44.81 - 1.65 (1.74-1.65) | 36.80-1.51 (1.55 - 1.51) | 36.57 - 1.06 (1.10 - 1.06) |
| R <sub>meas</sub> (%) §                  | 10.4 (160.1)             | 10.6 (828.1)             | 10.5 (268.5)               |
| CC 1/2 §                                 | 99.7 (40.7)              | 99.7 (8.8)               | 99.9 (19.8)                |
| Mean I/sigI §                            | 7.51 (0.93)              | 14.78 (2.85)             | 10.64 (0.56)               |
| Completeness (%)§                        | 99.1 (99.1)              | 94.4 (93.5)              | 93.02 (44.81)              |
| Multiplicity§                            | 3.1 (3.1)                | 6.9 (6.9)                | 10.6 (2.5)                 |
| <b>Refinement</b>                        |                          |                          |                            |
| No. reflections #                        | 24155 (2348)             | 12843 (642)              | 68774 (3431)               |
| R <sub>work</sub> /R <sub>free</sub> (%) | 21.9 / 25.0              | 19.4 /20.7               | 17.2 / 19.23               |
| No. of atoms                             | 2893                     | 822                      | 1806                       |
| a.a. residues                            | 184                      | 95                       | 207                        |
| protein chains per asu                   | 2                        | 1                        | 2                          |
| Bond lengths (Å)                         | 0.0083                   | 0.01                     | 0.01                       |
| Bond angles (°)                          | 1.4                      | 1.23                     | 1.2                        |
| <b>Ramachandran plot</b>                 |                          |                          |                            |
| Favored (%)                              | 98.89                    | 97.8                     | 97.04                      |
| Allowed (%)                              | 1.11                     | 2.2                      | 2.46                       |
| Outlier (%)                              | 0                        | 0                        | 0.5                        |

§ Values in parentheses indicate outer shell # Values in parentheses indicate reflections in test set

**Table S2.** Primers used in this study.

| Name                                     | Sequence 5'-3'                                                       |
|------------------------------------------|----------------------------------------------------------------------|
| 35S promoter                             | CTATCCTTCGCAAGACCCTTC                                                |
| attB1_AVR <sub>A6</sub> _noSP            | GGGGACAAGTTTGTACAAAAAAGCAGGCTTAATGAACCTATATTACAAATGTGA<br>TGTTGGCG   |
| attB1_AVR <sub>A7</sub> _noSP            | GGGGACAAGTTTGTACAAAAAAGCAGGCTTAATGGCGGATCCATACTTTGAAT<br>GC          |
| attB1_CSEP0333                           | GGGGACAAGTTTGTACAAAAAAGCAGGCTTAATGAACCGACAATTCAAATGTG<br>ATGATGG     |
| attB1_MLA6                               | GGGGACAAGTTTGTACAAAAAAGCAGGCTTAATGGATATTGTC                          |
| attB1_MLA7                               | GGGGACAAGTTTGTACAAAAAAGCAGGCTTAATGGATATTGTCACCGGTGCC                 |
| attB1 AVR <sub>A6</sub> _ML27_K44        | GGGGACAAGTTTGTACAAAAAAGCAGGCTTCATGAACCTATATTACAAATGT                 |
| attB1AVR <sub>A22</sub> _a6central       | GGGGACAAGTTTGTACAAAAAAGCAGGCTTCATGGATGGCTGGACATGTGCC                 |
| attB1CSEP0333                            | GGGGACAAGTTTGTACAAAAAAGCAGGCTTCATGAACCGACAATTCAAATGT                 |
| attB2_AVR <sub>A7</sub> _Nostop          | GGGGACCACCTTTGTACAAGAAAGCTGGGTTGGGTTTATGGAAGGGACATAGT<br>CG          |
| attB2_AVR <sub>A7</sub> _stop            | GGGGACCACCTTTGTACAAGAAAGCTGGGTTTTAGGGTTTATGGAAGGGACATA<br>GTCG       |
| attb2_CSEP0333+stop                      | GGGGACCACCTTTGTACAAGAAAGCTGGGTTCTAACGAATATCTTGCAGAGAAC<br>ATACTTTCCA |
| attb2_CSEP0333nostop                     | GGGGACCACCTTTGTACAAGAAAGCTGGGTTACGAATATCTTGCAGAGAACATA<br>CTTTCCA    |
| attB2_MLA6_nostop                        | GGGGACCACCTTTGTACAAGAAAGCTGGGTTGTTCTCCTCCTC                          |
| attB2_MLA6_stop                          | GGGGACCACCTTTGTACAAGAAAGCTGGGTTCTAGTTCTCCTC                          |
| attB2_MLA7_nostop                        | GGGGACCACCTTTGTACAAGAAAGCTGGGTTGAAATCAGTTCTCCTCCTCCT<br>CAC          |
| attB2_MLA7_stop                          | GGGGACCACCTTTGTACAAGAAAGCTGGGTTTCAGAAATCAGTTCTCCTCCTCT<br>CCT        |
| attB2A6ML27_K44noStop                    | GGGGACCACCTTTGTACAAGAAAGCTGGGTCACGAATATCTTGCAGAGAACA                 |
| attB2A6ML27_K44Stop                      | GGGGACCACCTTTGTACAAGAAAGCTGGGTCCTAACGAATATCTTGCAGAGA                 |
| attB2AVR <sub>A22</sub> _a6centralStop   | GGGGACCACCTTTGTACAAGAAAGCTGGGTTAACGGTAATCGCTTTCAAAA                  |
| attB2AVR <sub>A22</sub> _a6centralnoStop | GGGGACCACCTTTGTACAAGAAAGCTGGGTCACGGTAATCGCTTTCAAATC                  |
| attB2CSEP0333ML27_K44noSt<br>op          | GGGGACCACCTTTGTACAAGAAAGCTGGGTCACGAATATCTTGCAGAGAACA                 |
| AttB2CSEP0333ML27_K44Sto<br>p            | GGGGACCACCTTTGTACAAGAAAGCTGGGTCCTAACGAATATCTTGCAGAGA                 |
| AVR <sub>A1</sub> _XhoIRNostop           | CCGCTCGAGGGTGCATTCTTCAATGAATT                                        |
| AVR <sub>A1</sub> _XhoIRstop             | CCGCTCGAGCTAGGTGCATTCTTCAATGA                                        |
| AVR <sub>A10</sub> _XhoIRNostop          | CCGCTCGAGACGGTAATCGCTTTCAAAA                                         |
| AVR <sub>A10</sub> _XhoIRstop            | CCGCTCGAGCTAACGGTAATCGCTTTCAAAA                                      |
| AVR <sub>A10</sub> NBamHI                | CGCGGATCCATGGATGGCTGGACATGTGCC                                       |
| AVR <sub>A13</sub> _Nde1NSTR             | CCGCTCGAGTTCAGGGCTTCAAACCAT                                          |
| AVR <sub>A13</sub> _Nde1STR              | CCGCTCGAGCTATTCAGGGCTTCAAACCAT                                       |
| AVR <sub>A13</sub> -1NBamHI              | CGCGGATCCATGGCTGGCGATGGTTATA                                         |

**Table S2.** Primers used in this study – continued.

|                                  |                                 |
|----------------------------------|---------------------------------|
| AVR <sub>A22</sub> _XhoIRNostop  | CCGCTCGAGACGGTAATCGCTTTCAAAT    |
| AVR <sub>A22</sub> _XhoIRstop    | CCGCTCGAGTTAACGGTAATCGCTTTCAAAT |
| AVR <sub>A6</sub> MF27LF         | ATGCTGCTTTGGTAGAAAACATAG        |
| AVR <sub>A6</sub> MI31RR         | AAAGCAGCATCACAATCC              |
| AVR <sub>A6</sub> A49TF          | TTATTTATTCACCCAAAGAACGTATAG     |
| AVR <sub>A6</sub> A49TR          | GACTTGTGTGATTCTCG               |
| AVR <sub>A6</sub> L47FF          | AGTCTTATTTTTTCGCCCAAAGAAC       |
| AVR <sub>A6</sub> L47FR          | TGTGTGATTCTCGGTTG               |
| AVR <sub>A6</sub> ME40GF         | GTTCCAACCGGGGAATCACAC           |
| AVR <sub>A6</sub> ME40GR         | ATTTGGGTGTTTATCTATGTTTTCTAC     |
| AVR <sub>A6</sub> MF27LR         | CACAATCCATATTCAAACC             |
| AVR <sub>A6</sub> MI31RF         | TGTAGAAAACCGGGATAAACACCCAAATG   |
| AVR <sub>A6</sub> MK33EF         | AAACATAGATGAACACCCAAATG         |
| AVR <sub>A6</sub> MK33ER         | TCTACAAAAGCAGCATCAC             |
| AVR <sub>A6</sub> MN36RF         | TAAACACCCACGAGTTCCAACCGAGG      |
| AVR <sub>A6</sub> MN36RR         | TCTATGTTTTCTACAAAAGC            |
| AVR <sub>A6</sub> NBamHI         | CGCGGATCCATGAACCTATATTACAAATGT  |
| AVR <sub>A6</sub> Q50KF          | TTTATTCGCCAAAAGAACGTATAG        |
| AVR <sub>A6</sub> Q50KR          | TAAGACTTGTGTGATTCC              |
| AVR <sub>A6</sub> Y53CF          | CAAAGAACGTGTAGAGATAGAC          |
| AVR <sub>A6</sub> Y53CR          | GGCGAATAAATAAGACTTG             |
| AVR <sub>A7-1</sub> _XhoIRNostop | CCGCTCGAGGGGTTTATGGAAGGGAC      |
| AVR <sub>A7-1</sub> _XhoIRstop   | CCGCTCGAGTTAGGGTTTATGGAAGGGAC   |
| AVR <sub>A9-1</sub> _XhoIRNostop | CCGCTCGAGACACGGCCCGCATT         |
| AVR <sub>A9-1</sub> _XhoIRstop   | CCGCTCGAGTTAACACGGCCCGCATT      |
| AVRPM17AXhol                     | CCGCTCGAGTTAGGACAGAGGGCATTCCAG  |
| AVRPM17AXholno                   | CCGCTCGAGGGACAGAGGGCATTCCAG     |
| AVRPM17BamHI                     | CGCGGATCCATGACTCAAGTCTACACTTGC  |
| AVRPM1ABamHI                     | CGCGGATCCATGGCCTTCAGCTACAAGACC  |
| AVRPM1AXholstop                  | CCGCTCGAGGGAGTGCACGGAGCA        |
| AVRPM1AXholnostop                | CCGCTCGAG GTCGCGCAGCACCAGGGT    |
| AVR <sub>PM2</sub> BamHI         | CGCGGATCCATGGAGTCTACTGGGACTGC   |
| AVRPM3 <sup>A2/F2</sup> BamHI    | CGCGGATCCATGGGTCTGTGCTAACGCT    |

**Table S2.** Primers used in this study – continued.

|                                            |                                  |
|--------------------------------------------|----------------------------------|
| AVRPM3 <sup>A2/F2</sup> XhoI               | CCGCTCGAGTTA GTGCAGGATGATGTTTCAG |
| AVRPM3 <sup>A2/F2</sup> XhoI <sub>no</sub> | CCGCTCGAG GTGCAGGATGATGTTTCAG    |
| AVRPM3 <sup>B2/C2</sup> BamHI              | CGCGGATCCATG TACCTGTTCTACCGTTGC  |
| AVRPM3 <sup>B2/C2</sup> XhoI               | CCGCTCGAGTTA GTTAGCGTAGTAGGGCTC  |
| AVRPM3 <sup>B2/C2</sup> XhoI <sub>no</sub> | CCGCTCGAG GTTAGCGTAGTAGGGCTC     |
| AVRPM3 <sup>D3</sup> BamHI                 | CGCGGATCCATG GTGATCTTCGACTGCTCC  |
| AVRPM3 <sup>D3</sup> XhoI                  | CCGCTCGAGTTA GATCACGGAGGAGGAGCA  |
| AVRPM3 <sup>D3</sup> XhoI <sub>no</sub>    | CCGCTCGAG GATCACGGAGGAGGAGCA     |
| AVRPM8BamHI                                | CGCGGATCCATG CTGCGACTACTACAAGTGC |
| AVRPM8XhoI                                 | CCGCTCGAGTTA CATCACGAAGTCCAGCAG  |
| AVRPM8XhoI <sub>no</sub>                   | CCGCTCGAG CATCACGAAGTCCAGCAG     |
| CSEP0333RemoveStop                         | ACGAATATCTTGACAGAGAAC            |
| GST                                        | ACCGTCTCCGGGAGCTGCATGTGTGAGAGG   |
| HAVR <sub>A6</sub> C53YF                   | AAAAGAGCTTATGCAAATATACC          |
| HAVR <sub>A6</sub> C53YR                   | GGTGAAAAATAAGACTTGTG             |
| HAVR <sub>A6</sub> K50QF                   | TTTTTTCACCCAAAGAGCTTGTG          |
| HAVR <sub>A6</sub> K50QR                   | TAAGACTTGTGTGATTCC               |
| HAVR <sub>A6</sub> ME33KR                  | AAACCGGGATAAACACCCACG            |
| HAVR <sub>A6</sub> ME33FR                  | TCTGTCAAAGCACTATTACAAG           |
| HAVR <sub>A6</sub> MG40EF                  | ATTCCAACCGAGGAATCACACAAG         |
| HAVR <sub>A6</sub> MG40ER                  | TCGTGGGTGTTTCATCCCG              |
| HAVR <sub>A6</sub> ML27FF                  | ATAGTGCTTTTACAGAAAACCG           |
| HAVR <sub>A6</sub> ML27FR                  | TACAAGCCTTTTTATTACATC            |
| HAVR <sub>A6</sub> MN36RF                  | TGAACACCCAAATATTCCAACCGGG        |
| HAVR <sub>A6</sub> MN36RR                  | TCCCGTTTTCTGTCAAAG               |
| HAVR <sub>A6</sub> MR31IF                  | GACAGAAAACATAGATGAACACCCAC       |
| HAVR <sub>A6</sub> MR31IR                  | AAAGCACTATTACAAGCC               |
| HAVR <sub>A6</sub> F47LF                   | AGTCTTATTTATTCACCAAAGAGCTTG      |
| HAVR <sub>A6</sub> F47LR                   | TGTGTGATCCCCGGTTG                |
| HAVR <sub>A6</sub> T49AF                   | TTATTTTTTCGCCAAAAGAGCTTG         |
| HAVR <sub>A6</sub> T49AR                   | GACTTGTGTGATCCCCCG               |
| Hybird F                                   | GACCCAGCTTTCTGTAC                |
| M1<br>F27L+I31R+K33E+N36R+E40<br>GF        | GTTCCAACCGGGGAATCACAC            |

**Table S2.** Primers used in this study – continued.

|                                     |                                 |
|-------------------------------------|---------------------------------|
| M1<br>F27L+I31R+K33E+N36R+E40<br>GR | TCTTGGGTGTTTCATCTCTG            |
| M1 F27L+I31R+K33E+N36RF             | GAACACCCAAGAGTTCCAACCG          |
| M1 F27L+I31R+K33E+N36RR             | ATCTCTGTTTTCTACCAAAG            |
| M1 F27L+I31R+K33EF                  | AAACAGAGATGAACACCCAAATG         |
| M1 F27L+I31R+K33ER                  | TCTACCAAAGCAGCATCAC             |
| M1 F27L+I31RF                       | GTAGAAAACAGAGATAAACACC          |
| M1 F27L+I31RR                       | CAAAGCAGCATCACAATC              |
| M1 N36R+E40G F                      | GTTCCAACCGGGAATCACAC            |
| M1 N36R+E40G R                      | TCGTGGGTGTTTATCTATGTTTTCTAC     |
| M1 N36R+E40G+K33E F                 | AAACATAGATGAACACCCACG           |
| M1 N36R+E40G+K33E R                 | TCTACAAAAGCAGCATCAC             |
| M2 47+52 F                          | CCAAAGAGCGTATAGAGATAG           |
| M2 47+52 R                          | GCGAAAAATAAGACTTGTGTGATTCC      |
| M2 49+47 F                          | AGTCTTATTTTTTACCCAAAGAACGTATAG  |
| M2 49+50+53+52 F                    | CACCAAAAGAGCGGTAGAGATAG         |
| M2 49+50+53+52 R                    | AATAAATAAGACTTGTGTGATTCC        |
| M2 4950+47 F                        | AGTCTTATTTTTTACCCAAAGAACGTATAG  |
| M2 495052+47 F                      | AGTCTTATTTTTTACCCAAAGAACGTG     |
| M2 4953+47 F                        | AGTCTTATTTTTTACCCAAAGAACGTG     |
| M2 5053+47 F                        | AGTCTTATTTTTTCGCCAAAAGAACG      |
| M2 A49T_F                           | TTATTTATTCACCCAAAGAACGTATAGAG   |
| M2 A49T_R                           | GACTTGTGTGATTCCCCG              |
| M2 A49T+Y53C F                      | CAAAGAACGTGTAGAGATAGAC          |
| M2 A49T+Y53C R                      | GGTGAATAAATAAGACTTGTG           |
| M2 Q50K+A49T F                      | TTATTTATTCACCCAAAGAACGTATAGAG   |
| M2 Q50K+A49T R                      | GACTTGTGTGATTCCCCG              |
| M2 Q50K+A49T+Y53C F                 | AAAAGAACGTGTAGAGATAGACTAG       |
| M2 Q50K+A49T+Y53C R                 | GGTGAATAAATAAGACTTGTG           |
| M2 Q50K+Y53C F                      | AAAAGAACGTGTAGAGATAGACTAG       |
| M2 Q50K+Y53C R                      | GGCGAATAAATAAGACTTG             |
| M2 T52A F                           | CGCCCAAAGAGCGTATAGAGATAG        |
| M2 T52A R                           | AATAAATAAGACTTGTGTGATTCC        |
| pGEX- 6P-1F                         | TTGAAACTCTCAAAGTTGATTTTCTTAGCA  |
| PWI2BamHI                           | CGCGGATCCATG GGTGGTGGCTGGACCAAC |
| PWI2Xholstop                        | CCGCTCGAGTTA CATGATGTTGCAACCCTC |



**Table S2.** Primers used in this study – continued.

|                                    |                                 |
|------------------------------------|---------------------------------|
| PW12Xholnostop                     | CCGCTCGAG CATGATGTTGCAACCCTC    |
| RemoveStopAVR <sub>A6</sub> _R     | ACGAATATCTTGACAGAGAAC           |
| RemoveStoppENTR_F                  | GACCCAGCTTTCTTGAC               |
| SVRPM3 <sup>A1/F1</sup> BamHI      | CGCGGATCCATG TTCGACCTGATCGACGAC |
| SVRPM3 <sup>A1/F1</sup> Xholstop   | CCGCTCGAGTTA CTGACGACGGTAGGTAGC |
| SVRPM3 <sup>A1/F1</sup> Xholnostop | CCGCTCGAG CTGACGACGGTAGGTAGC    |

---

**Dataset S1** (separate file). Raw relative luciferase measurements and statistics for protoplast assays.

**Dataset S2** (separate file). Sequence alignments for RALPH subfamilies shown in Fig. 5.

### Supporting References

1. S. Bauer *et al.*, The leucine-rich repeats in allelic barley MLA immune receptors define specificity towards sequence-unrelated powdery mildew avirulence effectors with a predicted common RNase-like fold. *PLoS Pathog.* **17** (2021).
2. I. M. Saur *et al.*, Multiple pairs of allelic MLA immune receptor-powdery mildew AVR(A) effectors argue for a direct recognition mechanism. *Elife* **8** (2019).
3. T. Nakagawa *et al.*, Improved Gateway binary vectors: high-performance vectors for creation of fusion constructs in transgenic analysis of plants. *Biosci. Biotechnol. Biochem.* **71**, 2095-2100 (2007).
4. A. V. Garcia *et al.*, Balanced nuclear and cytoplasmic activities of EDS1 are required for a complete plant innate immune response. *PLoS Pathog.* **6**, e1000970 (2010).
5. K. Norkunas, R. Harding, J. Dale, B. Dugdale, Improving agroinfiltration-based transient gene expression in *Nicotiana benthamiana*. *Plant Methods* **14**, 71 (2018).
