# Supplementary material for: Structural polymorphisms within a common powdery mildew effector scaffold as a driver of coevolution with cereal immune receptors
Source: PubMed Central journal article supplement — Proc Natl Acad Sci U S A. 2023 Jul 31;120(32):e2307604120. doi: 10.1073/pnas.2307604120 (PMC10410722; doi:10.1073/pnas.2307604120), 2023-07-31
Supplement: pnas.2307604120.sd02.pdf [file pnas.2307604120.sd02.pdf]

# Multiple sequence alignment (MSA) of AVR<sub>A6</sub> subfamily members

|                   | 1        | 10    | 20       | 30        | 40          |             |          |     |     |       |        |
|-------------------|----------|-------|----------|-----------|-------------|-------------|----------|-----|-----|-------|--------|
| BgAVE_4843        | ..NVVYFR | CYGL  | EITPD.Q  | TR.....   | KAFSTFFRRDV | PGF         | PSFAR    | DKS | FYS | SNP   | ININI. |
| BgLOL_1493        | ..DLRYE  | CSL   | GKFTTMVK | LTGFL...  | YDLELESHTN  | LS          | PKRE     | VVE | T   | RRY   | SEM    |
| Bgtv316_251       | ..TQVY   | TCYRS | QPLSKAL  | TDLLAR... | YATADQVYEND | PGY         | GDRQ     | VHK | T   | HR    | SKN    |
| Bg_DAC_2147       | ASLNSY   | FVCGQ | EILLSS.E | IHCNES... | VYFYSNAEADD | PTG         | PNGE     | QFS | A   | FR    | TKK    |
| Bgtv316_8331      | ..EENYE  | CKSD  | QTFCYSC  | ISSLGL... | SDFNSYIEKGE | PLF         | VGG      | IYG | S   | H     | Q      |
| Bg_DAC_5942       | ..EPYK   | CNNN  | QNFYLS   | VKAKAE... | YATATLSENIR | PHV         | P        | DGE | TRN | S     | Y      |
| Bg_SECS1459_2519  | ..LFEF   | KCNS  | GEIVSENL | VRNNGG... | AASFCECREGD | PAP         | PAGE     | WFG | V   | KR    | F      |
| Bg_DAC_7322       | ..LFEF   | KCNS  | GEIVSENL | VRNNGG... | AASFYECREGD | PAP         | PAGE     | WFG | V   | KR    | F      |
| BLGH_07092        | ..NLYK   | CDV   | GDSVNLEE | VLNMD...  | DAALTENRDEH | PRI         | TGN      | H   | S   | L     | I      |
| BLGH_03262        | ..EGYK   | CPS   | DNLKKESE | IMEYQH... | LASPNNKSSH  | PKP         | PAG      | TCS | S   | Y     | T      |
| Bg_DAC_7757       | ..MGHFR  | CGG   | GDP      | PLSVGE    | WDIANDDDGK  | F           | L        | TEN | R   | E     | E      |
| Bgtv316_434       | ..DRHY   | TCVH  | GRIVSEKE | VLEEAG... | MAYDTPVYHDH | PPT         | P        | TGE | T   | Y     | K      |
| BLGH_00697        | ..NRYY   | KCEI  | SDPVSEAD | VIKMVS... | DRTLEKNADIH | PKV         | P        | TGE | S   | H     | K      |
| BLGH_00698        | ..NRQF   | K     | DD       | GNPMSLED  | VNKKAC...   | NSAFVENIDKH | P        | NV  | P   | T     | E      |
| BLGH_00700        | ..NQHY   | K     | DD       | DPVGVVEE  | AQSMED...   | DCASTKNLDEH | P        | A   | I   | L     | T      |
| Bgtv316_451       | ..NRHY   | I     | CDR      | GDP       | IDEVV       | ALRAMN...   | NAFMIEHS | HEH | P   | A     | I      |
| Bgtv316_450       | ..NRHY   | I     | CDR      | GDP       | IDEVV       | ALRTM...    | NAFMIEHS | HEH | P   | A     | I      |
| Bg_DAC_368        | ..NLQY   | R     | CEI      | GDP       | ITESQ       | VLETVN...   | KSF      | L   | D   | N     | S      |
| Bgtv316_445       | ..NREY   | K     | CES      | GDP       | LLSQV       | FAMET...    | ERFTIPNS | HEH | P   | A     | I      |
| Bgtv316_452       | ..YPHY   | Q     | CEH      | GELLSVQE  | IIDLVS...   | NVKTRHNQDDH | P        | A   | I   | P     | S      |
| Bg_SECS1459_1061  | ..YPHY   | Q     | CEH      | GELLSVQE  | IIDLVS...   | NVKTRHNQDDH | P        | A   | I   | P     | S      |
| BLGH_05881        | ..NLHY   | R     | CPY      | GDP       | FVVEE       | VLR         | L        | S   | N   | ...   | G      |
| BLGH_05875        | ..SKQY   | R     | CPR      | GDP       | ISKED       | VLRYSK...   | GHS      | E   | S   | F     | N      |
| BLGH_05877        | ..SLQY   | R     | CDR      | GDP       | LSLED       | VLRKAT...   | GK       | P   | E   | N     | K      |
| BLGH_05876        | ..SIQY   | R     | CEL      | GDLVSMEL  | VLR         | L           | S        | S   | ... | G     | H      |
| BLGH_05882        | ..SIQY   | R     | CPR      | GDVVSMDM  | VLR         | L           | S        | S   | ... | D     | H      |
| BgLOL_2299        | ..DRYR   | K     | CR       | G         | L           | D           | I        | S   | E   | K     | E      |
| Bgtv316_449       | ..KRHY   | K     | CDH      | GRPFSE    | EY          | IS          | K        | A   | R   | ...   | Y      |
| Bg_DAC_4448       | ..KRHY   | K     | CDH      | GRPFSE    | EY          | IS          | K        | A   | R   | ...   | Y      |
| BgTRIT_T1-20_191  | ..NRQY   | K     | CPS      | GDP       | T           | F           | E        | E   | A   | T     | I      |
| Bg_DAC_3411       | ..NRQY   | K     | CPS      | GDP       | T           | F           | E        | E   | A   | T     | I      |
| Bgtv316_447       | ..NGQF   | R     | CPR      | GDP       | F           | T           | M        | T   | R   | I     | L      |
| BgTRIT_T1-20_7341 | ..NGQF   | R     | CPR      | GDP       | F           | T           | M        | T   | R   | I     | L      |
| consensus>70      | ..% .C . | gd    | ..i      | .....     | p .         | p           | ge       | ..s | ..f | ..... |        |

|                   | 50      | 60       | 70       | 80    | 90  |     |     |       |   |     |   |
|-------------------|---------|----------|----------|-------|-----|-----|-----|-------|---|-----|---|
| BgAVE_4843        | ..FPILK | DGE...   | TTIEDKFN | GP    | YLI | W   | GVY | F     | L | H   | T |
| BgLOL_1493        | .....   | ..AENK   | D        | YKIQ  | L   | TRK | Y   | P     | Y | R   | I |
| Bgtv316_251       | .....   | ..TGSV   | D        | YLI   | Q   | I   | V   | G     | P | Q   | N |
| Bg_DAC_2147       | .....   | ..GGII   | D        | YLI   | Q   | L   | S   | N     | E | H   | P |
| Bgtv316_8331      | .....   | ..GTSL   | K        | YLI   | Q   | S   | I   | G     | V | D   | P |
| Bg_DAC_5942       | .....   | ..FGAN   | W        | YLV   | Q   | Y   | K   | G     | K | P   | R |
| Bg_SECS1459_2519  | SWSPHS  | FELAF    | FANHN    | FRPPG | IR  | YLV | Q   | H     | L | N   | A |
| Bg_DAC_7322       | SWSPHS  | FELAF    | FANHN    | FRPPG | IR  | YLV | Q   | H     | L | N   | A |
| BLGH_07092        | VSYPA   | .....    | ..P      | T     | L   | V   | K   | L     | T | V   | P |
| BLGH_03262        | GYPF    | PH       | S        | D     | I   | F   | L   | N     | R | P   | F |
| Bg_DAC_7757       | A.....  | ..PQAS   | A        | YLI   | Q   | V   | Y   | G     | D | P   | A |
| Bgtv316_434       | Q.....  | ..QYIAS  | A        | YLV   | Q   | V   | Y   | G     | S | P   | Q |
| BLGH_00697        | R.....  | ..PRITA  | A        | YLV   | Q   | V   | Y   | G     | D | P   | K |
| BLGH_00698        | I.....  | ..PGLSA  | A        | YLV   | Q   | V   | Y   | G     | D | P   | K |
| BLGH_00700        | K.....  | ..PGISI  | A        | YMI   | Q   | V   | Y   | G     | N | P   | K |
| Bgtv316_451       | R.....  | ..LGIAC  | A        | YLL   | Q   | V   | Y   | G     | D | P   | P |
| Bgtv316_450       | R.....  | ..LGIAC  | A        | YLL   | Q   | V   | Y   | G     | D | P   | P |
| Bg_DAC_368        | E.....  | ..SGIAS  | A        | F     | L   | I   | Q   | V     | Y | G   | P |
| Bgtv316_445       | E.....  | ..PGVSS  | A        | YLV   | Q   | V   | Y   | G     | E | P   | P |
| Bgtv316_452       | E.....  | ..DETL   | L        | YLI   | Q   | V   | Y   | G     | P | P   | K |
| Bg_SECS1459_1061  | GWFSQ   | LS       | D        | I     | C   | L   | I   | N     | C | S   | S |
| BLGH_05881        | V.....  | ..FEV    | S        | YI    | I   | Q   | V   | Y     | G | N   | P |
| BLGH_05875        | L.....  | ..TYAAA  | A        | YVI   | Q   | V   | Y   | D     | N | P   | P |
| BLGH_05877        | D.....  | ..IYHAA  | A        | F     | L   | L   | Q   | V     | Y | G   | D |
| BLGH_05876        | D.....  | ..TRHVG  | A        | YLI   | Q   | V   | Y   | G     | D | P   | P |
| BLGH_05882        | E.....  | ..IFHID  | A        | YLI   | Q   | V   | Y   | G     | D | P   | P |
| BgLOL_2299        | S.....  | ..IIRAAN | A        | YLL   | Q   | V   | Y   | G     | E | P   | K |
| Bgtv316_449       | S.....  | ..LDLGC  | A        | YLI   | Q   | V   | Y   | G     | D | P   | P |
| Bg_DAC_4448       | S.....  | ..LDLGC  | A        | YLI   | Q   | V   | Y   | G     | D | P   | P |
| BgTRIT_T1-20_191  | D.....  | ..SKQYA  | A        | YLL   | Q   | V   | Y   | G     | D | P   | P |
| Bg_DAC_3411       | D.....  | ..SRQYA  | A        | YLL   | Q   | V   | Y   | G     | D | P   | P |
| Bgtv316_447       | G.....  | ..TETYG  | A        | H     | L   | L   | Q   | V     | Y | G   | P |
| BgTRIT_T1-20_7341 | G.....  | ..TETYG  | A        | H     | L   | L   | Q   | V     | Y | G   | P |
| consensus>70      | .....   | ..y      | l        | qv    | gd  | p   | ..q | ..... | w | ..c |   |

```

100
BgAVE_4843          TFGQLMNG
BgLOL_1493          .....
Bgtv316_251        .....
Bg_DAC_2147         .....
Bgtv316_8331        .....
Bg_DAC_5942         .....
Bg_SECS1459_2519    PY.....
Bg_DAC_7322         PY.....
BLGH_07092          .....
BLGH_03262          .....
Bg_DAC_7757         .....
Bgtv316_434         .....
BLGH_00697          .....
BLGH_00698          .....
BLGH_00700          .....
Bgtv316_451         .....
Bgtv316_450         .....
Bg_DAC_368          .....
Bgtv316_445         .....
Bgtv316_452         .....
Bg_SECS1459_1061    .....
BLGH_05881          .....
BLGH_05875          .....
BLGH_05877          .....
BLGH_05876          .....
BLGH_05882          .....
BgLOL_2299          .....
Bgtv316_449         .....
Bg_DAC_4448         .....
BgTRIT_T1-20_191    .....
Bg_DAC_3411         .....
Bgtv316_447         .....
BgTRIT_T1-20_7341   .....
consensus>70        .....

```

# Multiple sequence alignment (MSA) of AVR<sub>A7</sub> subfamily members

|                   | 1   | 10 | 20 | 30 | 40 | 50 | 60 |
|-------------------|-----|----|----|----|----|----|----|
| Bg_DAC_7352       | MSR | PT | TR | FF | LS | PV | PS |
| BgTRIT_T1-20_2761 | Y   | Q  | C  | E  | H  | G  | E  |
| Bg_SECS1459_3368  | N   | R  | E  | Y  | K  | C  | E  |
| BgTRIT_T1-20_5798 | S   | L  | O  | Y  | R  | C  | D  |
| Bgtv316_6193      |     |    |    |    |    |    |    |
| Bgtv316_8282      |     |    |    |    |    |    |    |
| BLGH_06963        |     |    |    |    |    |    |    |
| Bg_DAC_4561       |     |    |    |    |    |    |    |
| BLGH_07048        |     |    |    |    |    |    |    |
| BLGH_05403        |     |    |    |    |    |    |    |
| BLGH_07006        |     |    |    |    |    |    |    |
| Bg_DAC_226        |     |    |    |    |    |    |    |
| Bg_DAC_2147       |     |    |    |    |    |    |    |
| Bg_SECS1459_7718  |     |    |    |    |    |    |    |
| Bg_SECS1459_2049  |     |    |    |    |    |    |    |
| Bgtv316_8324      |     |    |    |    |    |    |    |
| BLGH_07087        |     |    |    |    |    |    |    |
| Bgtv316_260       |     |    |    |    |    |    |    |
| Bgtv316_8333      |     |    |    |    |    |    |    |
| Bg_SECS1459_1061  |     |    |    |    |    |    |    |
| BLGH_04763        |     |    |    |    |    |    |    |
| BgTRIT_T1-20_4719 |     |    |    |    |    |    |    |
| BLGH_07086        |     |    |    |    |    |    |    |
| Bgtv316_8313      |     |    |    |    |    |    |    |
| BgLOL_5114        |     |    |    |    |    |    |    |
| Bg_DAC_4110       |     |    |    |    |    |    |    |
| Bgtv316_8310      |     |    |    |    |    |    |    |
| BgTRIT_T1-20_7515 |     |    |    |    |    |    |    |
| BLGH_06991        |     |    |    |    |    |    |    |
| BgAVE_3936        |     |    |    |    |    |    |    |
| Bgtv316_8319      |     |    |    |    |    |    |    |
| BLGH_07004        |     |    |    |    |    |    |    |
| Bgtv316_2696      |     |    |    |    |    |    |    |
| Bgtv316_4514      |     |    |    |    |    |    |    |
| BLGH_01226        |     |    |    |    |    |    |    |
| Bgtv316_2692      |     |    |    |    |    |    |    |
| BLGH_05877        |     |    |    |    |    |    |    |
| Bg_SECS1459_7232  |     |    |    |    |    |    |    |
| BgTRIT_T1-20_3173 |     |    |    |    |    |    |    |
| BgAVE_6379        |     |    |    |    |    |    |    |
| Bg_DAC_4813       |     |    |    |    |    |    |    |
| Bgtv316_8302      |     |    |    |    |    |    |    |
| Bg_DAC_3070       |     |    |    |    |    |    |    |
| BLGH_06960        |     |    |    |    |    |    |    |
| Bgtv316_8321      |     |    |    |    |    |    |    |
| Bg_DAC_4560       |     |    |    |    |    |    |    |
| Bgtv316_8308      |     |    |    |    |    |    |    |
| Bg_SECS1459_2788  |     |    |    |    |    |    |    |
| Bg_DAC_4657       |     |    |    |    |    |    |    |
| Bg_DAC_4305       |     |    |    |    |    |    |    |
| BLGH_04764        |     |    |    |    |    |    |    |
| BLGH_04765        |     |    |    |    |    |    |    |
| Bgtv316_4510      |     |    |    |    |    |    |    |
| Bgtv316_445       |     |    |    |    |    |    |    |
| Bgtv316_8329      |     |    |    |    |    |    |    |
| Bgtv316_253       |     |    |    |    |    |    |    |
| Bg_DAC_519        |     |    |    |    |    |    |    |
| BgTRIT_T1-20_367  |     |    |    |    |    |    |    |
| BLGH_07049        |     |    |    |    |    |    |    |
| BgLOL_6292        |     |    |    |    |    |    |    |
| Bg_DAC_2293       |     |    |    |    |    |    |    |
| Bgtv316_8331      |     |    |    |    |    |    |    |
| Bgtv316_8180      |     |    |    |    |    |    |    |
| BLGH_07084        |     |    |    |    |    |    |    |
| BLGH_07005        |     |    |    |    |    |    |    |
| Bg_SECS1459_3091  |     |    |    |    |    |    |    |
| BgTRIT_T1-20_3159 |     |    |    |    |    |    |    |
| Bgtv316_8311      |     |    |    |    |    |    |    |
| BgTRIT_T1-20_996  |     |    |    |    |    |    |    |
| BLGH_05395        |     |    |    |    |    |    |    |
| Bgtv316_5533      |     |    |    |    |    |    |    |
| BgTRIT_T1-20_2822 |     |    |    |    |    |    |    |
| consensus>70      |     |    |    |    |    |    |    |

f . c . . . . . dp . . p . ge . .



```

Bg_DAC_7352          VSRV...SEDEHTQPCLIN...
BgTRIT_T1-20_2761  SQKTEN...GWKECSINLV...
Bg_SECS1459_3368   SQMSTE...GWKLCT...
BgTRIT_T1-20_5798  SQYSEE...GWGLCDVEEIH...
Bgtv316_6193      FERTE...GWQECPPYYP...
Bgtv316_8282      FEKVG...AVSCPFQRE...
BLGH_06963        FEKIAG...VWQPCPFYLR...
Bg_DAC_4561       LEKIGG...VWRQCPFYLR...
BLGH_07048        LEKIGG...VWRQCPFYLR...
BLGH_05403        FEKIGG...VWRQCPFYLR...
BLGH_07006        YEETTS...GWRPCPFLD...
Bg_DAC_226        FEDITG...EWLPCSFHLLDSWSQ...YDRFKM...
Bg_DAC_2147       FEKTEQ...GWRPCPFHKP...
Bg_SECS1459_7718  FEKTAQ...GWQPCTFDKA...
Bg_SECS1459_2049  FKKVET...GWKPCYEYEAALVFE...
Bgtv316_8324      FKKVET...GWKPCVYEYEAALVFE...
BLGH_07087        FEIDIG...DWRPCTFYER...
Bgtv316_260       FDKIEG...DWRPCLYHES...
Bgtv316_8333      FDKIEG...DWRPCSYHES...
Bg_SECS1459_1061  YEKINK...NWKQCAVVKDTSRTP...WRK...
BLGH_04763        YTPKII...
BgTRIT_T1-20_4719  YEDLSN...EWEPVYQETNKHTD...SDSDES...
BLGH_07086        YESGG...VFKPCPFIED...
Bgtv316_8313      YESGG...VFKPCPFIED...
BgLOL_5114        YMREST...QFKPCPFNQD...
Bg_DAC_4110       YEKDK...GWELCLFREN...
Bgtv316_8310      YEKQFY...EFFFFCLQEK...
BgTRIT_T1-20_7515  YETQSR...GFYPCNWIES...
BLGH_06991        FEKQSG...EFYPCNLLEN...
BgAVE_3936        FEKQSG...EFYPCNLLEN...
Bgtv316_8319      YKRDRP...PWKLCPYFEN...
BLGH_07004       YERGSK...TWKPCSYFKD...
Bgtv316_2696      YEKPY...NWKQCFMCKHNGHL...IGLIFIEAPGSGIL...
Bgtv316_4514      YEKPY...VWEQCIYHDET...
BLGH_01226       YEKPY...VWEQCIYHDET...
Bgtv316_2692     YEKSYKDYHLNPDGTWELFPYHNDT...
BLGH_05877       YEKSYKDYHLNPDGTWELCPYHNDT...
Bg_SECS1459_7232  YEKSYEDYRLNPAGTWELCPYHNDT...
BgTRIT_T1-20_3173  YEKSYEDYRLNPAGTWELCPYHNDT...
BgAVE_6379       YLLRGD...NWQPCVYMSN...
Bg_DAC_4813      YVLRGD...NWQPCVYMSN...
Bgtv316_8302     YEKYRK...TWDPCTFVS...
Bg_DAC_3070      YTRNAE...RWQRCLFWNY...
BLGH_06960       YTRNAE...RWQPCVYMSN...
Bgtv316_8321     YTRNAE...RWQPCVYMSN...
Bg_DAC_4560      FORTTE...VWEP...
Bgtv316_8308     FERDEQ...VWEP...
Bg_SECS1459_2788  FERDEQ...VWEP...
Bg_DAC_4657      FERTTQ...IWKPCVFIED...
Bg_DAC_4305      FERTTQ...IWKPCVFIED...
BLGH_04764      FHKIKE...VWKP...
BLGH_04765      FHRTE...VQEP...
Bgtv316_4510     FEITS...GHKCP...
Bgtv316_445      FDVTS...GHKQ...
Bgtv316_8329     YEKVSS...NWKI...
Bgtv316_253      FELTSS...QWSA...
Bg_DAC_519       YESYNY...KWTQCK...
BgTRIT_T1-20_367  YQWYHD...KWIE...
BLGH_07049       YIFSNN...RWKLCPIDEQ...
BgLOL_6292       YEYGQS...GWEF...
Bg_DAC_2293      YEYGQS...GWEF...
Bgtv316_8331     YEYNES...KWQSCILRNGK...
Bgtv316_8180     YEYHEP...KWHP...
BLGH_07084       FEASGS...LWKICTFKNT...
BLGH_07005       FEYNDG...KWKCNLI...
Bg_SECS1459_3091  FESSEG...QWRI...
BgTRIT_T1-20_3159  FESSEG...QWRI...
Bgtv316_8311     FESSGG...RWHICTIKGS...
BgTRIT_T1-20_996  FESSGG...RWHICTMEGS...
BLGH_05395       HEFTGT...KWEK...
Bgtv316_5533     HEFTGT...KWEK...
BgTRIT_T1-20_2822  YEWNTD...KWEK...
consensus>70    ye...w...c

```

## Multiple sequence alignment (MSA) of AVR<sub>A10</sub>/AVR<sub>A22</sub> subfamily members

```

1      10      20      30      40      50      60
BLGH_05021 MYND DYT F Y C N G Q L F D T E S V R A T A T Y S A D Q I A G S L N G Y P A V Y E F S H P R G V A P F Q L F P L L P
BgPOA_6159 . . . . . V M Y D C F G T I I D G D V V K R A E A S H D Y A S T S K V A . . . . . L I K E D . S K I P Y T Y F D I H T
Bgtv316_6209 . . . . . D S Y C R G K Y F D G D V R S Q A S Y W Q R Q Q K K I S . . . . . K L S T S . D G E K L A Y F E L G N
BLGH_05020 . . . . . D S Y C R G K Y F D G D V R S Q A S Y W Q R Q Q K K I S . . . . . K L S T S . D G E K L A Y F E L G N
Bg_DAC_4215 . . . . . N Y Y C G N M S F R K D H V R T Q A R H W V S R Q A T F S . . . . . E F H T R . D D Q Q L A Y F E L S T
BgAVE_4762 . . . . . N Y Y C G N M S F R K D H V R T Q A R H W V S R Q A T F S . . . . . E F H T R . D D Q Q L A Y F E L S T
BLGH_01413 . . . . . D G F Q C G S Q S I S G D E A R R Q A K H W V G C Q K T K F S . . . . . E F V T Q . D Q V F L C Y F E L S P
Bg_SECS1459_6790 . . . . . D G F Q C G S Q S I S G D E A R R Q A K H W V G C Q K T K F S . . . . . E F V T Q . D Q V F L C Y F E L S P
Bgtv316_6210 . . . . . D G W T C A G R N Y E G V N V R A Q A R H W V G E G N L K G S . . . . . D F R A S . N R S K L H F F E V G E
Bg_SECS1459_3169 . . . . . D G W T C A G R N Y E G V N V R A Q A R H W V G E G N L K G S . . . . . D F R A S . N R S K L H F F E V G E
Bg_LOL_6315 . . . . . G G W T C A G R N F E G D E V R A Q A E H W A R E G I D K V S . . . . . D F V N D . E G G Q L Y Y F E V G R
BgPOA_4369 . . . . . G G W T C A G R N F E G D E V R A Q A E H W A R E G I D K V S . . . . . D F V N D . E G G Q L Y Y F E V G R
Bg_LOL_714 . . . . . D G W T C A G S D F D G D V R G Q A R H W V D Q Q K T K F S . . . . . D F Q T H . D G V Q L C H F E L G E
BgTRIT_T1-20_758 . . . . . D G W T C A G R N V K G D D V R A Q A R H W V G L M N T K F S . . . . . E F E I K . D S V Q L C Y I E I G E
BgAVE_1525 . . . . . D G W T C A G R N V K G D D V R A Q A R H W V G L M N T K F S . . . . . E F E I K . D S V Q L C Y I E I G E
Bg_LOL_5698 . . . . . D G W T C A G R N V K G D D V R A Q A R H W V G L S D T R F S . . . . . E F E I K . G G V Q L C Y I E I G E
consensus>70 . . . . . d . . . . c . g . . . . g d . v r . q a . h w . . . . . k . s . . . . . e f . . . . . d . . . . l . y f e . .

```

```

70
BLGH_05021 DH . . . K F Y T G . . . . . G K L . . . K Y L . . . . .
BgPOA_6159 T G Q Y S E R Y T G F A C F V D T A M T K P D V R K H . . H E E T W W P C N R L T S S . . . . .
Bgtv316_6209 G N E I S E I K T G Y R G Y F V A G G D L H E V R Y K A . E N N V W M P C T W H Y . . . . .
BLGH_05020 G N E I S E I K T G Y R G Y F V A G G D L H E V R Y K A . E N N V W M P C T W H Y . . . . .
Bg_DAC_4215 D T T P T N R K T G Y R G Y C Q E D G D L Y Q V R Y E T . T N G N W Q L C I E F D S D L G D R . .
BgAVE_4762 D T T P T N R K T G Y R G Y C Q E D G D L Y Q V R Y E T . T N G N W Q L C I E F D S D L G D R . .
BLGH_01413 H S Q I T D S Y T G F R G Y C D E P G N L Y E V R Y Y D . . G N W K K C T Y F D Q D L G N H . .
Bg_SECS1459_6790 H S Q I T D S Y T G F R G Y C D E P G N L Y E V R Y Y D . . G N W K K C T Y F D Q D L G N H . .
Bgtv316_6210 G L I L T E W . . . V R A Y C T L T G D I Y N L R Y L D Q D T N E W N E C D R Y . . . . .
Bg_SECS1459_3169 G L I L T E W . . . V R A Y C T L T G D I Y N L R Y L D Q D T N E W N E C D R Y . . . . .
Bg_LOL_6315 E T Q L T E S C T G C R A Y T N K S G K I Y N L R F L D Y D D G Q W K L C T P Y . . . . .
BgPOA_4369 E T Q L T E S C T G C R A Y T N K S G K I Y N L R F L D Y D D G Q W K L C T P Y . . . . .
Bg_LOL_714 G N Q L T Q S I T G F R A Y C D E P G D V Y N V R Y W D V S S R T W V L C T H Y D I D F E S D Y R
BgTRIT_T1-20_758 G A Q T T K . . . G F R A Y L D E P G A V Y N V R Y Y D Y N D C Q W K L C T H Y D G D A G V N Y R
BgAVE_1525 G A Q T T K . . . G F R A Y L D E P G A V Y N V R Y Y D Y N D C Q W K L C T H Y D G D A G V N Y R
Bg_LOL_5698 G A Q T T K E F T G F R A Y L D E P G A V Y N V R Y Y D Y N D R Q W K L C T H Y D R D A G A N Y R
consensus>70 . . . . . t e . . t g . r . y . . . . g . . y n . r y . . . . . w . . c . y . . . . .

```

# Multiple sequence alignment (MSA) of AVR<sub>PM2</sub> subfamily members

|                   | 1                                     | 10           | 20    | 30              | 40              |
|-------------------|---------------------------------------|--------------|-------|-----------------|-----------------|
| BLGH_04995        | .....DIVFYCDGLAITEDHKTAYGNSQSA...PI   | NG.....      | YF    | TVMTPIYYNEP.CD  |                 |
| Bg_DAC_540        | .....NTIFHCGSIPITAEDIKTAYNNNSKSA...PI | AG.....      | YF    | TIMRIQYFEDA.FN  |                 |
| Bg_DAC_3871       | ..FLPGAHLFCSEDRKIFLSAIDHHEN.....      | .....        | FL    | EFYL.....DA     |                 |
| BLGH_06957        | .....EKYFECNGKYILYSTIVENVNISYNTLFG    | NGDN.....    | FL    | LATLAGQNPITI.NF |                 |
| BgAVE_3494        | .....SVVNCGLNRIDVDHVKRVAAGLWRMKYE     | SLKAYNNVL    | YF    | KKYEE...TAYASEA |                 |
| BLGH_02099        | .....KKLFYCGPAEVSVEHVDVSAKYLWTHKI     | WTYQSDHEGAF  | YF    | HYGEE...SDYG..E |                 |
| Bgtv316_3286      | .....RFVSCGITNIEDENVADVAGNLWTKYKLG    | QFQSDSQGS    | FP    | QKVGN..SEYG..E  |                 |
| BgTRIT_T1-20_2287 | .....DDYFSCGFAQISVENVDRAVGNLWSHEL     | GAFAQSSFEGR  | FP    | VSLGE..SEYG..E  |                 |
| Bgtv316_3290      | .....DQYISCGMGSISRNSITLSVAKDMWNMSL    | SGCPS.YHET   | FP    | AEYRQ...SSEG..M |                 |
| Bg_SECS1459_7354  | ...AGDDYITLGMGTSIKVQHTHSVARDMWTMD     | IDIDYKSEYQGR | YF    | AFWGN...VRGK..P |                 |
| BgAVE_6117        | ...AGDGYITLGMGSIHKNDIYRVAEHMTIDAY     | SVPSNNHGS    | YF    | IFGEE...INGS..V |                 |
| Bg_DAC_5764       | QFVNDGSPMFHCKGVTFYSESVRKSAETAHN       | AYFSG        | ING   | .....           | YF              |
| BgAVE_3411        | .....GSYTCYNRQTFTEEYVNTMADKCFGVSE     | GVSEGS       | SVGG  | .....           | YF              |
| BgPOA_613         | .....GSYTCYNRQTFTEEYVNTIADKCFGVNE     | GVSEGS       | SVGG  | .....           | YF              |
| BLGH_02072        | .....GSYTCYNRQTFTEEYVNTIADKCFGVSE     | GVSEGS       | SVGG  | .....           | YF              |
| Bg_DAC_2858       | .....AGFNCKGVIFTSDHIDGVMNLVFLQLG      | SLIDG        | ..... | YF              | KPYMPSFGAKGCAG  |
| Bgtv316_4554      | .....AGFNCKGVIFTSDHIDGVMNLVFLQLG      | SLIDG        | ..... | YF              | KPYMPSFGAKGCAG  |
| Bgtv316_2624      | .....AGFNCKGVIFTSDHIDGVMNLVFLQLG      | SLIDG        | ..... | YF              | KPYMPSFGAKGCAG  |
| BgTRIT_T1-20_452  | .....AGFNCKGVIFTSDHIDGVMNLVFLQLG      | SLIDG        | ..... | YF              | KPYMPSFGAKGCAG  |
| Bg_DAC_3539       | .....VHWECLNVKIFYETSVYQAFFAWSNEN      | TVNN         | ..... | YF              | KRCIKWEDPTGIDEE |
| BLGH_03699        | .....VHWECLNVKIFYETSVYQAFFAWSNEN      | TVNN         | ..... | YF              | KRCIKWEDPTGIDEE |
| BgAVE_3810        | .....VHWECLNVKIFYETSVYQAFFAWSNEN      | TVNN         | ..... | YF              | KRCIKWEDPTGIDEE |
| BgLOL_1177        | .....YWDCCNGTLILYENVRAAVDFAFSCSPG     | SFYE         | ..... | YF              | SIYRSQPPWPLGLQ  |
| BLGH_07103        | .....EAYWNCNGTPIILYVIVRDAVELAF        | TLQPG        | SISG  | .....           | YF              |
| Bg_DAC_2136       | .....EAYWNCNGTPIILYVIVRDAVELAF        | TLQPG        | SISG  | .....           | YF              |
| Bg_DAC_4253       | .....ESYWDCKGIPILFRVHAARELAF          | TSQPG        | SISG  | .....           | YF              |
| BLGH_02100        | .....ESYWDCKGIPILFRVHAARELAF          | TSQPG        | SISG  | .....           | YF              |
| BgPOA_4678        | .....ESYWDCKGIPILFRVHAARELAF          | TSQPG        | SISG  | .....           | YF              |
| BgTRIT_T1-20_3146 | .....AGYWACDGVVIPNDNALSAAARSAF        | GFAAGFYHG    | ..... | YF              | SIVRTTTPPEQGLGE |
| Bg_DAC_2688       | .....YWDCCDYYRVPDKNVRDAAVFAFSKEK      | SFHG         | ..... | YF              | ATFIIIGSTFSGVGE |
| BgTRIT_T1-20_3623 | .....AAYWNCNGTPIPDERARSAAARLAF        | SFVFN        | TVHG  | .....           | YF              |
| BgTRIT_T1-20_3057 | .....AAYWNCNGTPIPDERARSAAARLAF        | SFVFN        | TVHG  | .....           | YF              |
| Bgtv316_7593      | .....AAYWNCNGTPIPDDKVRDAVNLAF         | YYAPG        | SFHD  | .....           | YF              |
| Bg_SECS1459_1112  | .....AAYWNCNGTPIPDDKVRDAVNLAF         | YYAPG        | SFHD  | .....           | YF              |
| Bg_SECS1459_5998  | .....YWNCCQGTAISDENVRAAVQSAFSYPKE     | SFHG         | ..... | YF              | ATFIIIGSTFSGVGE |
| Bg_SECS1459_1522  | .....AAYWDCDGTETPERNVRAAVVLAENYRKE    | SFHG         | ..... | YF              | ATFIIIGSTFSGVGE |
| consensus>70      | .....c.....v.....                     |              |       |                 | yp              |

|                   | 50                                                    | 60    | 70                              | 80                    |                 |
|-------------------|-------------------------------------------------------|-------|---------------------------------|-----------------------|-----------------|
| BLGH_04995        | YTA YPI LLNRETSITSPRGHYFLV WKS A                      | ..... | VNW                             | .....DVFVKATGT        |                 |
| Bg_DAC_540        | YTA YPM LLNGATSLTNPNGHYFLV WTE N                      | ..... | SNW                             | .....NVMKLNTE         |                 |
| Bg_DAC_3871       | EHD D P L G P D G R R C S A . Y R Y S V I G N D G S T | ..... | I M T L I Q A T Y E S P F N     | R V E K I G G V W     |                 |
| BLGH_06957        | K H K F D R Y S D V E . . . . . S D V S . . . . .     | ..... | V Q L Y . . . . . S P N H I V   | A V E A T I G P R T   |                 |
| BgAVE_3494        | L R K F P L F A D G R . . . . . W N G G F . . . . .   | ..... | F M Y F V V S S Q S Q N V W     | M L F Y E D D S G L   |                 |
| BLGH_02099        | L R K F P L L P S G F . . . . . V T F G S . . . . .   | ..... | F N H Y V V S N E K G D Y I     | K L Y Y V G T D G T   |                 |
| Bgtv316_3286      | L R K F P L L Y G C N . . . . . H W D H G S . . . . . | ..... | F M Y Y V I S N K N G D Y I     | K L Y Y T S T N G D   |                 |
| BgTRIT_T1-20_2287 | L R K F P L L Y N G K . . . . . D W E F G C . . . . . | ..... | F M Y H V I S N R E G S Y V     | K L F Y E G T K G L   |                 |
| Bgtv316_3290      | T R R F P I I Y N S Q . . . . . K W T S G G . . . . . | ..... | F Y Y I V E S S Q N R K F I     | R L H Y Y G I T . T   |                 |
| Bg_SECS1459_7354  | A R K Y P L L Y E G K . . . . . V W T H G S . . . . . | ..... | F M Y Y V V A T E D L S Y I     | R L Y Y E G T E . S   |                 |
| BgAVE_6117        | T R I F P I V Y N G D . . . . . D W R S G D . . . . . | ..... | F Y Y S V E S T E D L S Y I     | K L R Y N G A R . Y   |                 |
| Bg_DAC_5764       | H K L F P M V R D V D . . . . . V Y S G G A . . . . . | ..... | V S Y Y F L F I D G N G Q Q R G | V G Y S I E V G Y     |                 |
| BgAVE_3411        | F R K F P L L A G G G . . . . . E W S G G A . . . . . | ..... | V N Y F V A S D S A R Q T K     | R V F Y T S G R F D   |                 |
| BgPOA_613         | F R K F P L L A G G G . . . . . E W S G G A . . . . . | ..... | V N Y F V A S G S A R Q T K     | R V F Y T S G R F D   |                 |
| BLGH_02072        | F R K F P L L A G G G . . . . . E W S G G A . . . . . | ..... | V N Y F V A S D S V R Q T K     | R V F Y T S G R F D   |                 |
| Bg_DAC_2858       | C L E F P L S D T L E . . . . . I W R G G P . . . . . | ..... | V E Y R A V F G P M R D T V     | N V F S D I D G . G   |                 |
| Bgtv316_4554      | C L E F P L S D T Q K . . . . . I W R G G P . . . . . | ..... | V K Y R A V F G P L R D T V     | N V F S D I D G . G   |                 |
| Bgtv316_2624      | C L E F P L S D T L K . . . . . I W R G G P . . . . . | ..... | V K Y R A V F G P L R D T V     | N V F S D I D G . G   |                 |
| BgTRIT_T1-20_452  | C L E F P L S D T L E . . . . . I W R G G P . . . . . | ..... | V K Y R A V F G P L R D T V     | N V F S D I D G . G   |                 |
| Bg_DAC_3539       | F R S F P L E A T G I . . . . . P W T S G T . . . . . | ..... | V S Y Y V V S N R D R S K L     | K V F S E L R G . G   |                 |
| BLGH_03699        | F R S F P L Q A T G L . . . . . P W T S G T . . . . . | ..... | V S Y Y V V S N R N R S K L     | K V F S E L R G . G   |                 |
| BgAVE_3810        | F R S F P L Q A T G L . . . . . P W T S G T . . . . . | ..... | V S Y Y V V S N R N R S K L     | K V F S E L R G . G   |                 |
| BgLOL_1177        | L R E F P I T A S G K . . . . . L W Q S F F S S L L Y | ..... | I A Y Y I L A T Q D T S Y C     | Q V F A T E G L . G   |                 |
| BLGH_07103        | L R Q F P V I A S G A . . . . . T W L G G D . . . . . | ..... | I I Y Y L L A N A E M T F C     | D V F S T E G L . G   |                 |
| Bg_DAC_2136       | L R Q F P V I A S G A . . . . . T W L G G D . . . . . | ..... | I I Y Y L L A N A E M T F C     | D V F S T E G L . G   |                 |
| Bg_DAC_4253       | R R Q F P L T D T G A . . . . . R W Q G G G . . . . . | ..... | I T Y Y V E A T R D K R H C     | E V F G T A G G . V   |                 |
| BLGH_02100        | R R Q F P L T D T G A . . . . . R W Q G G G . . . . . | ..... | I T Y Y V E A T R D K R H C     | E V F G T A G G . V   |                 |
| BgPOA_4678        | R R Q F P L T D T G A . . . . . R W Q G G G . . . . . | ..... | I T Y Y V E A T R D K R H C     | E V F G T A G G . V   |                 |
| BgTRIT_T1-20_3146 | L R L F P V S L T N E . . . . . S W S G G A . . . . . | ..... | V D Y Y V M T N Q D R S Y I     | K V Y S N V G L . G   |                 |
| Bg_DAC_2688       | I R K F P V D C S E E . . . . . N W Q G E H . . . . . | ..... | V N F Y V L T N R D R K F I     | Q V V Y T F G D . G   |                 |
| BgTRIT_T1-20_3623 | L R T F P I K N T D E . . . . . S W Q G G D . . . . . | ..... | V D Y Y V L A N I G L S V M     | E V F V V E A N . N   |                 |
| BgTRIT_T1-20_3057 | L R T F P I K N S D E . . . . . S W Q G G N . . . . . | ..... | V D Y Y V L A N I G L S V M     | E V F V V E A N . N   |                 |
| Bgtv316_7593      | R R Q F P L T T S I G . . . . . N W Q G G E . . . . . | ..... | V D F Y I L T N I D A S F L     | E V F S S K G T . G   |                 |
| Bg_SECS1459_1112  | V R Q F P L T T S I G . . . . . N W Q G G E . . . . . | ..... | V D F Y I L T N I D A S F L     | E V F S S K G T . G   |                 |
| Bg_SECS1459_5998  | V R Q F P V E D S D A . . . . . N W Q G G A . . . . . | ..... | V K Y Y I L T N K R G S Y L     | E V F S S V G S . G   |                 |
| Bg_SECS1459_1522  | V R Q F P V E D S D A . . . . . N W Q G G A . . . . . | ..... | V K Y Y I L T N K R G S Y L     | E V F S S V G S . G   |                 |
| consensus>70      | . r . f p . . . . .                                   |       | . w . g . . . . .               | . v . y y v . . . . . | . v f . . . . . |

|                   | 90 | 100                |
|-------------------|----|--------------------|
| BLGH_04995        | ES | WMAVPFLGRRRLDSIVTM |
| Bg_DAC_540        | KF | QMTSQYWGSSLQITLNL  |
| Bg_DAC_3871       | RQ | PPFYLRE.....       |
| BLGH_06957        | YP | CYAVTIE.....       |
| BgAVE_3494        | HN | PLDQYYG.....       |
| BLGH_02099        | VE | CDIPRD.....        |
| Bgtv316_3286      | VE | CDIYGP.....        |
| BgTRIT_T1-20_2287 | EE | CVIVIPE.....       |
| Bgtv316_3290      | QE | CYVTGV.....        |
| Bg_SECS1459_7354  | CD | REVPSP.....        |
| BgAVE_6117        | ET | CMVSSPE.....       |
| Bg_DAC_5764       | QL | CDAY.....          |
| BgAVE_3411        | DE | CAYTR.....         |
| BgPOA_613         | DE | CAYTR.....         |
| BLGH_02072        | DE | CAYTR.....         |
| Bg_DAC_2858       | QE | CVSA.....          |
| Bgtv316_4554      | QE | CVSA.....          |
| Bgtv316_2624      | QE | CVSA.....          |
| BgTRIT_T1-20_452  | QE | CVSA.....          |
| Bg_DAC_3539       | FL | CNLIVTD.....       |
| BLGH_03699        | FL | CNLKVTD.....       |
| BgAVE_3810        | FL | CNLKVTD.....       |
| BgLOL_1177        | YE | CTHILG.....        |
| BLGH_07103        | YR | CDLVAS.....        |
| Bg_DAC_2136       | YR | CDLVAG.....        |
| Bg_DAC_4253       | YK | CTLVLRD.....       |
| BLGH_02100        | YK | CTLVLLD.....       |
| BgPOA_4678        | YK | CTLVLLD.....       |
| BgTRIT_T1-20_3146 | TM | CGYYET.....        |
| Bg_DAC_2688       | GN | CAHVQD.....        |
| BgTRIT_T1-20_3623 | KR | CTKVAG.....        |
| BgTRIT_T1-20_3057 | KR | CTKVAG.....        |
| Bgtv316_7593      | HK | CTYFEG.....        |
| Bg_SECS1459_1112  | HK | CAYFEG.....        |
| Bg_SECS1459_5998  | NE | CTFVEG.....        |
| Bg_SECS1459_1522  | NK | CTFVEG.....        |
| consensus>70      | .. | c.....             |
